# Supplementary material
Source: PubMed Central journal article supplement (PMC6211189)
Supplement: NIHMS993505-supplement-Supporting_Information.pdf [file NIHMS993505-supplement-Supporting_Information.pdf]

**Supplementary Material:**

**Total Synthesis of (-)-Laulimalide**

Arun K. Ghosh,\* Yong Wang

Department of Chemistry, University of Illinois at Chicago,

845 West Taylor Street, Chicago, Illinois 60607

All the moisture sensitive reactions were carried out under nitrogen atmosphere. Anhydrous solvents were obtained as follows: THF, distilled from sodium and benzophenone; dichloromethane, distillation from  $P_2O_5$ ; pyridine, toluene and benzene, distillation from  $CaH_2$ . All other solvents were HPLC grade. Column chromatography was performed with Whatman 240-400 mesh silica gel under low pressure of 5-10 psi. Thin-layer chromatography (TLC) was carried out with E. Merck silica gel 60-F-254 plates.  $^1H$  and  $^{13}C$  NMR spectra were recorded on Bruker AM 400, Avance 400 and Avance 500 spectrometers.

**TBS ether 6.** To a solution of lactone **5** (146 mg, 0.561 mmol) in  $CH_2Cl_2$  (3 mL) at  $-78$  °C was added DIBAL (1.0 M in hexane; 0.67 mL, 0.67 mmol). The mixture was stirred at  $-78$  °C for 30 min and then quenched with 10% Roche's

salt solution. The resulting mixture was warmed to 23 °C and stirred for 1 h. The layers were separated. The aqueous layer was extracted with CH<sub>2</sub>Cl<sub>2</sub>. The combined organic layers were washed with brine, dried over anhydrous Na<sub>2</sub>SO<sub>4</sub> and concentrated. The residue was dissolved in EtOH (3 mL). CSA (6 mg) was added. The resulting mixture was stirred at 23 °C for 30 min. The mixture was quenched with Et<sub>3</sub>N (2 drops) and concentrated. The residue was purified by silica gel chromatography (5% EtOAc/hexane) to afford the ethyl acetal (a colorless oil, 134 mg, 82%) as a colorless oil.  $[\alpha]_D^{23}$ -23 (*c* 1.12, CHCl<sub>3</sub>); IR(thin film): 2954, 2925, 1453, 1272, 1103 cm<sup>-1</sup>. <sup>1</sup>H-NMR (500 MHz, CDCl<sub>3</sub>) δ 7.40-7.12 (m, 5H), 6.00 (m, 1H), 5.73 (m, 1H), 4.96 (s, 1H), 4.51 (s, 2H), 4.03 (m, 1H), 3.83 (m, 1H), 3.50 (m, 1H), 3.37 (dd, *J* = 8.9, 5.8 Hz, 1H), 3.27 (dd, *J* = 9.0, 6.8 Hz, 1H), 2.13 (m, 1H), 1.97-1.93 (m, 2H), 1.72-1.64 (m, 2H), 1.23 (dt, *J* = 7.1, 1.6 Hz, 3H), 0.99 (d, *J* = 6.7 Hz, 3H); <sup>13</sup>C-NMR (125 MHz, CDCl<sub>3</sub>) δ 138.6, 129.1, 128.2, 127.5, 127.3, 125.5, 94.4, 76.1, 72.9, 63.7, 63.0, 39.4, 31.3, 29.7, 16.5, 15.2. MS(ESI): 313 (M<sup>+</sup> + Na), 181.

To a mixture of the above ethyl acetal (7.58 g, 26.1 mmol) and vinyloxy-*tert*-butyldimethylsilane (6.33 g, 39.2 mmol) in CH<sub>2</sub>Cl<sub>2</sub> (50 mL) was added Montmorillonite K-10 (7.6 g) with ice cooling. After stirring at 23 °C for 30 min, the mixture was filtered through Celite and concentrated. The residue was dissolved in MeOH (50 mL). NaBH<sub>4</sub> (1.5 g, 39.7 mmol) was slowly added at 0 °C. After stirring for 30 min at 0 °C, the mixture was quenched by saturated aqueous NH<sub>4</sub>Cl. The mixture was extracted with 30% EtOAc/hexane. The

combined organic layers were washed with brine, dried over anhydrous  $\text{Na}_2\text{SO}_4$ , and concentrated. The residue was purified by silica gel chromatography (20% EtOAc/hexane) to afford the alcohol (a colorless oil, 4.11 g, 54%) as a single isomer. IR(thin film): 3417, 2928, 2872, 1092, 1071  $\text{cm}^{-1}$ .  $^1\text{H-NMR}$  (500 MHz,  $\text{CDCl}_3$ )  $\delta$  7.36-7.29 (m, 5H), 5.84 (m, 1H), 5.67 (dd,  $J = 10.3, 1.7$  Hz, 1H), 4.53 (s, 2H), 4.40 (brd,  $J = 8.3$  Hz, 1H), 3.99-3.78 (m, 3H), 3.36 (dd,  $J = 9.1, 6.2$  Hz, 1H), 3.27 (dd,  $J = 9.1, 6.4$  Hz, 1H), 2.70 (brs, 1H), 2.12-2.05 (m, 2H), 1.96-1.86 (m, 2H), 1.79 (m, 1H), 1.68 (m, 1H), 1.23 (m, 1H), 0.99 (d,  $J = 6.7$  Hz, 3H);  $^{13}\text{C-NMR}$  (125 MHz,  $\text{CDCl}_3$ )  $\delta$  139.1, 129.7, 128.7, 128.0, 127.8, 124.6, 76.6, 73.4, 71.3, 66.0, 61.2, 39.5, 36.3, 31.3, 30.2, 17.4. MS(ESI): 290 ( $\text{M}^+ + \text{H}$ ), 181.

To a solution of the above alcohol (5.05 g, 17.4 mmol) in DMF (20 mL) was added imidazole (1.78 g, 26.2 mmol) followed by TBSCl (3.15 g, 20.9 mmol). The resulting suspension was stirred at 23 °C for 3 h. 20% EtOAc/hexane and water were added. The layers were separated and the aqueous layer was extracted with 20% EtOAc/hexane. The combined organic layers were washed with brine, dried over anhydrous  $\text{Na}_2\text{SO}_4$  and concentrated. The residue was purified by silica gel chromatography (2% EtOAc/hexane) to afford the TBS ether **6** as a colorless oil (5.29 g, 75%). IR(thin film): 2929, 2856, 1471, 1361, 1254, 1097  $\text{cm}^{-1}$ ;  $^1\text{H-NMR}$  (500 MHz,  $\text{CDCl}_3$ )  $\delta$  7.37-7.29 (m, 5H), 5.83 (m, 1H), 5.73 (dd,  $J = 10.3, 1.6$  Hz, 1H), 4.54 (s, 2H), 4.36 (m, 1H), 3.83-3.73 (m, 3H), 3.41 (dd,  $J = 9.1, 5.7$  Hz, 1H), 3.31 (dd,  $J = 9.1, 6.7$  Hz, 1H), 2.13 (m, 1H), 2.02-1.97 (m, 2H), 1.86 (m, 1H), 1.75-1.68 (m, 2H), 1.26 (m, 1H), 1.01 (d,  $J = 6.7$

Hz, 3H), 0.93 (s, 9H), 0.10 (s, 6H);  $^{13}\text{C}$ -NMR (125 MHz,  $\text{CDCl}_3$ )  $\delta$  139.4, 130.4, 128.7, 127.9, 127.8, 124.4, 76.7, 73.2, 69.8, 65.3, 60.3, 40.0, 37.3, 31.9, 30.1, 26.4, 18.8, 17.3, -4.9. MS(ESI): 405 ( $\text{M}^+ + \text{H}$ ), 299, 181.

**Iodide 7.** To a stirred solution of lithium (225 mg, 32.1 mmol) in liquid ammonia (50 mL) was added a solution of TBS ether **6** in THF (5 mL). The resulting mixture was stirred for 10 min. Solid  $\text{NH}_4\text{Cl}$  was added until the blue color disappeared. The mixture was warmed to 23°C. Water and  $\text{CH}_2\text{Cl}_2$  was added. The layers were separated and the aqueous layer was extracted with  $\text{CH}_2\text{Cl}_2$ . The combined organic layers were dried over anhydrous  $\text{Na}_2\text{SO}_4$  and concentrated. The residue was purified by silica gel chromatography (15% EtOAc/hexane) to afford the alcohol as a colorless oil (3.86 g, 95%). IR(thin film): 3419, 2929, 2858, 1471, 1255, 1096  $\text{cm}^{-1}$ ;  $^1\text{H}$ -NMR (400 MHz,  $\text{CDCl}_3$ )  $\delta$  5.81 (brd,  $J = 10.2$  Hz, 1H), 5.72 (brd,  $J = 10.2$  Hz, 1H), 4.38 (brs, 1H), 3.78-3.72 (m, 3H), 3.52 (m, 1H), 3.44 (m, 1H), 2.50 (brs, 1H), 1.99-1.97 (m, 2H), 1.90-1.85 (m, 2H), 1.71 (m, 1H), 1.64 (m, 1H), 1.34 (m, 1H), 1.20 (m, 1H), 0.95 (d,  $J = 6.7$  Hz, 3H), 0.93 (s, 9H), 0.07 (s, 6H);  $^{13}\text{C}$ -NMR (125 MHz,  $\text{CDCl}_3$ )  $\delta$  129.9, 124.3, 70.3, 68.9, 66.6, 60.0, 40.5, 37.4, 33.8, 32.0, 26.3, 18.7, 17.9, -5.0. MS(ESI): 515 ( $\text{M}^+ + \text{H}$ ), 297, 181.

To a suspension of the above alcohol (3.86 g, 12.3 mmol),  $\text{PPh}_3$  (6.475 g, 24.6 mmol) and imidazole (2.51 g, 36.9 mmol) in 2:1  $\text{Et}_2\text{O}$ -  $\text{CH}_3\text{CN}$  (30 mL) at 0 °C was slowly added  $\text{I}_2$  (6.22g, 24.5 mmol). After 30 min, 10%  $\text{Na}_2\text{S}_2\text{O}_3$  and

EtOAc was added. The layers were separated and the aqueous layer was extracted with EtOAc. The combined organic layers were washed with brine, dried over anhydrous  $\text{Na}_2\text{SO}_4$  and concentrated. The residue was purified by silica gel chromatography (5% EtOAc/hexane) to afford the iodide **7** as a colorless oil (5.03 g, 96%). IR(thin film): 2927, 2856, 1254, 1095  $\text{cm}^{-1}$ .  $^1\text{H-NMR}$  (400 MHz,  $\text{CDCl}_3$ )  $\delta$  5.83 (m, 1H), 5.72 (dd,  $J = 10.1, 1.7$  Hz, 1H), 4.36 (brd,  $J = 7.0$  Hz, 1H), 3.79-3.73 (m, 3H), 3.32 (dd,  $J = 9.5, 4.6$  Hz, 1H), 3.31 (dd,  $J = 9.5, 6.1$  Hz, 1H), 1.99-1.96 (m, 2H), 1.84-1.81 (m, 2H), 1.70-1.66 (m, 2H), 1.29 (m, 1H), 1.02 (d,  $J = 6.7$  Hz, 3H), 0.91 (s, 9H), 0.09 (s, 6H);  $^{13}\text{C-NMR}$  (125 MHz,  $\text{CDCl}_3$ )  $\delta$  130.3, 124.2, 69.7, 65.5, 60.2, 42.9, 37.3, 31.4, 30.9, 26.4, 20.5, 18.8, 18.3, -4.9. MS(ESI): 447 ( $\text{M}^+ + \text{Na}$ ), 332, 301.

**Lactone 9.** To a suspension of NaH (585 mg, 60% dispersion in mineral oil, 14.6 mmol) in DMF (40 mL) at 0 °C was added a solution of lactone **8** (5.24 g, 13.9 mmol) in DMF (5 mL). After 15 min, a solution of iodide **7** (5.03 g, 11.8 mmol) in DMF (5 mL) was added dropwise. The mixture was warmed to 23 °C and heated at 60 °C for 12 h. The mixture was then cooled to 23 °C. 25% EtOAc/hexane and water was added. The layers were separated and the aqueous layer was extracted with 25% EtOAc/hexane. The combined organic layers were dried over anhydrous  $\text{Na}_2\text{SO}_4$  and concentrated. The residue was purified by silica gel chromatography (10% EtOAc/hexane) to afford the lactone **9** (a colorless oil, 7.04 g, 89%) as a mixture of isomers (4.2 : 1, by 500 MHz  $^1\text{H}$

NMR). Major isomer: IR(thin film): 2928, 1769, 1513, 1309  $\text{cm}^{-1}$ ;  $^1\text{H-NMR}$  (500 MHz,  $\text{CDCl}_3$ )  $\delta$  7.93 (d,  $J = 7.4$  Hz, 2H), 7.71 (t,  $J = 7.4$  Hz, 1H), 7.58 (t,  $J = 8.2$  Hz, 2H), 7.28 (d,  $J = 8.6$  Hz, 2H), 6.92 (d,  $J = 8.6$  Hz, 2H), 5.77-5.71 (m, 1H), 5.66 (d,  $J = 10.1$  Hz, 1H), 4.84 (m, 1H), 4.49 (dd,  $J = 24.3, 11.5$  Hz, 2H), 4.28 (brs, 1H), 3.83 (s, 3H), 3.73-3.54 (m, 5H), 2.94 (dd,  $J = 15.1, 7.2$  Hz, 1H), 2.68 (dd,  $J = 15.1, 8.4$  Hz, 1H), 2.12-2.04 (m, 2H), 1.90-1.76 (m, 4H), 1.70-1.62 (m, 2H), 1.27 (m, 1H), 0.91 (s, 9H), 0.87 (d,  $J = 6.5$  Hz, 3H), 0.07 (s, 6H);  $^{13}\text{C-NMR}$  (125 MHz,  $\text{CDCl}_3$ )  $\delta$  159.8, 135.0, 134.6, 131.9, 131.4, 130.1, 130.1, 129.2, 129.1, 124.4, 114.3, 76.4, 73.3, 72.4, 71.3, 69.9, 64.4, 60.2, 55.8, 41.6, 40.0, 37.2, 31.8, 28.6, 26.4, 26.0, 23.1, 21.2, 18.8, 14.5, -4.9.

**Alcohol 11.** To a solution of lactone **9** (6.51 g, 9.68 mmol) in THF (50 mL) at 0 °C was added Red-Al (3.9 mL, 19.4 mmol; 65% w/w) dropwise. After 10 min, the reaction was quenched with 10% Roche's salt solution. The mixture was stirred at 23 °C for 2 h and then was extracted with EtOAc. The combined organic layers were washed with brine, dried over anhydrous  $\text{Na}_2\text{SO}_4$ , and concentrated to give the crude diol **10** which was used for the next reaction without further purification.

To a solution of the above diol **10** in  $\text{CH}_2\text{Cl}_2$  (50 mL) was added sequentially  $\text{Et}_3\text{N}$  (5.4 mL, 38.7 mmol), DMAP (237 mg, 1.94 mmol) and benzoyl chloride (3.4 mL, 29 mmol). After stirring at 23 °C for 12 h, the mixture was washed with saturated aqueous  $\text{NaHCO}_3$ , 1 M  $\text{NaHSO}_4$ , brine, dried

over anhydrous  $\text{Na}_2\text{SO}_4$  and concentrated. The crude dibenzoate was used for the next reaction immediately.

To a solution of the above dibenzoate in MeOH (50 mL) at  $-20\text{ }^\circ\text{C}$  was added  $\text{Na}_2\text{HPO}_4$  (8.2 g, 58 mmol) followed by sodium amalgam (6% w/w, 37.1 g). The suspension was stirred vigorously for 2 h and then was allowed to warm to  $23\text{ }^\circ\text{C}$  and stirred for 1 h. After this period, The mixture was quenched with saturated aqueous  $\text{NH}_4\text{Cl}$ . The mixture was decanted. Water and 25% EtOAc/hexane were added and the layers were separated. The aqueous layer was extracted with 25% EtOAc/hexane. The combined organic layers were dried over anhydrous  $\text{Na}_2\text{SO}_4$  and evaporated. The residue was chromatographed over silica gel (10% EtOAc/hexane) to furnish the alcohol **11** as a colorless oil (3.61 g, 72%).  $[\alpha]_D^{23}$  -27 (c 0.33,  $\text{CHCl}_3$ ); IR(thin film): 3498, 2927, 2856, 1514, 1250  $\text{cm}^{-1}$ ;  $^1\text{H-NMR}$  (400 MHz,  $\text{CDCl}_3$ )  $\delta$  7.29 (d,  $J = 8.6$  Hz, 2H), 6.91 (d,  $J = 8.6$  Hz, 2H), 5.82 (m, 1H), 5.67 (dd,  $J = 10.3, 1.6$  Hz, 1H), 4.90 (s, 1H), 4.86 (s, 1H), 4.52 (s, 2H), 4.35 (m, 1H), 3.96 (m, 1H), 3.83 (s, 3H), 3.79-3.72 (m, 3H), 3.50 (dd,  $J = 7.6, 3.4$  Hz, 1H), 3.38 (dd,  $J = 7.6, 7.2$  Hz, 1H), 2.40 (brs, 1H), 2.18 (d,  $J = 6.7$  Hz, 2H), 2.05 (dd,  $J = 13.3, 5.6$  Hz, 1H), 1.95-1.83 (m, 5H), 1.72-1.60 (m, 2H), 1.16 (m, 1H), 0.91 (s, 9H), 0.88 (d,  $J = 6.4$  Hz, 3H), 0.05 (s, 6H);  $^{13}\text{C-NMR}$  (100 MHz,  $\text{CDCl}_3$ )  $\delta$  159.7, 144.7, 130.5, 130.4, 129.8, 124.5, 115.0, 114.2, 74.4, 73.5, 69.9, 68.6, 65.1, 60.3, 55.7, 45.0, 43.4, 40.3, 37.2, 32.0, 27.1, 26.4, -4.9. MS(ESI): 519 ( $\text{M}^+ + \text{H}$ ), 483, 399.

**Aldehyde 2.** To a stirred solution of the alcohol **11** (3.64 g, 7.02 mmol) in  $\text{CH}_2\text{Cl}_2$  (10 mL) was added  $i\text{Pr}_2\text{NEt}$  (7.5 mL, 42.1 mmol) followed by  $\text{MOMCl}$  (2.7 mL, 35.1 mmol). After stirring at 23 °C for 3 h, The mixture was washed with 1 M  $\text{NaHSO}_4$ , brine, dried over anhydrous  $\text{Na}_2\text{SO}_4$  and evaporated. The residue was dissolved in  $\text{CH}_2\text{Cl}_2$  (10 mL). pH 7 buffer (0.5 mL) and DDQ (1.9 g, 8.42 mmol) was sequentially added. The green suspension was stirred at 23 °C for 2 h. The resulting orange suspension was then washed with saturated aqueous  $\text{NaHCO}_3$ . The aqueous layer was extracted with  $\text{CH}_2\text{Cl}_2$ . The combined organic layer was dried over anhydrous  $\text{Na}_2\text{SO}_4$  and concentrated. The residue was chromatographed over silica gel (15% EtOAc/hexane) to give the alcohol as a colorless oil (2.5 g, 81%).  $[\alpha]_D^{23}$  -18 (c 0.38,  $\text{CHCl}_3$ ); IR(thin film): 3458, 2952, 2928, 2857, 1462, 1251  $\text{cm}^{-1}$ ;  $^1\text{H-NMR}$  (400 MHz,  $\text{CDCl}_3$ )  $\delta$  5.78 (m, 1H), 5.67 (d,  $J = 10.4$  Hz, 1H), 4.83 (s, 1H), 4.81 (s, 1H), 4.69 (dd,  $J = 12.8, 5.9$  Hz, 2H), 4.30 (d,  $J = 7.6$  Hz, 1H), 3.75-3.58 (m, 5H), 3.47 (m, 1H), 3.40 (s, 3H), 3.07 (dd,  $J = 8.6, 4.1$  Hz, 1H), 2.26 (dd,  $J = 14.4, 7.0$  Hz, 1H), 2.13 (dd,  $J = 14.4, 6.4$  Hz, 1H), 2.02-1.78 (m, 6H), 1.69-1.55 (m, 2H), 1.09 (m, 1H), 0.95 (s, 9H), 0.86 (d,  $J = 6.3$  Hz, 3H), 0.04 (s, 6H);  $^{13}\text{C-NMR}$  (100 MHz,  $\text{CDCl}_3$ )  $\delta$  144.0, 129.8, 124.0, 113.5, 96.6, 79.8, 69.4, 65.2, 64.4, 59.8, 55.5, 44.8, 42.6, 37.8, 36.7, 31.5, 26.6, 25.9, 19.1, 18.2, -5.4. MS(ESI): 443 ( $\text{M}^+ + \text{H}$ ), 363, 279.

To a stirred solution of DMSO (0.98 mL, 13.8 mmol) in  $\text{CH}_2\text{Cl}_2$  (20 mL) at -78 °C was added oxalyl chloride (0.72 mL, 8.27 mmol) dropwise. After 2 minutes, the above alcohol (2.38 g, 5.51 mmol) in  $\text{CH}_2\text{Cl}_2$  (5 mL) was added



dropwise. The mixture was stirred at  $-78\text{ }^{\circ}\text{C}$  for 30 min. After this period,  $i\text{Pr}_2\text{NEt}$  (4.9 mL, 27.6 mmol) was added dropwise. The resulting mixture was stirred at  $-78\text{ }^{\circ}\text{C}$  for an additional 2 min and warmed to  $23\text{ }^{\circ}\text{C}$ . The mixture was washed with cold 1 M aqueous  $\text{NaHSO}_4$ , brine, dried over anhydrous  $\text{Na}_2\text{SO}_4$  and evaporated. The residue was chromatographed over silica gel (10% EtOAc/hexane) to afford aldehyde **2** as a colorless oil (2.02 g, 85%) which was used for next reaction immediately.  $^1\text{H-NMR}$  (400 MHz,  $\text{CDCl}_3$ )  $\delta$  9.63 (d,  $J = 1.2\text{ Hz}$ , 1H), 5.78 (m, 1H), 5.69 (d,  $J = 10.6\text{ Hz}$ , 1H), 4.91 (s, 1H), 4.88 (s, 1H), 4.69 (dd,  $J = 12.8, 7.0\text{ Hz}$ , 2H), 4.31 (brd,  $J = 7.6\text{ Hz}$ , 1H), 4.06 (m, 1H), 3.75-3.58 (m, 3H), 3.38 (s, 3H), 2.41-2.30 (m, 2H), 2.02-1.81 (m, 6H), 1.69-1.55 (m, 2H), 1.09 (m, 1H), 0.88 (s, 9H), 0.86 (d,  $J = 6.3\text{ Hz}$ , 3H), 0.05 (s, 6H).

**Alcohol 15.** To a solution of dibromide **12** (225 mg, 0.80 mmol) in THF (2 mL) at  $-78\text{ }^{\circ}\text{C}$  was added  $n\text{BuLi}$  (1 mL, 1.6 mmol; 1.6 M in hexane). The resulting dark red solution was stirred at  $-78\text{ }^{\circ}\text{C}$  for 1 h, then warmed to  $23\text{ }^{\circ}\text{C}$  for 1 h. The mixture was cooled to  $-78\text{ }^{\circ}\text{C}$ , then a solution of aldehyde **13** (108 mg, 0.31 mmol) in THF (2 mL) was added dropwise. The mixture was stirred at  $-78\text{ }^{\circ}\text{C}$  for 1 h and then was quenched by saturated aqueous  $\text{NH}_4\text{Cl}$ . The mixture was extracted with EtOAc. The organic layers were washed with brine, dried over anhydrous  $\text{Na}_2\text{SO}_4$  and concentrated. The residue was chromatographed over silica gel (30% EtOAc/hexane) to furnish the alkynyl alcohol (a colorless oil,

92.3 mg, 64%) as a mixture of isomers (*anti* : *syn* = 1.8 : 1, by 400 MHz <sup>1</sup>H-NMR).

To a solution of the above alcohol (786 mg, 1.67 mmol) in wet CH<sub>2</sub>Cl<sub>2</sub> (6 mL) was added Dess-Martin periodiane (1 g, 2.36 mmol). After 10 min, The mixture was diluted with ether and washed with a mixture (1:1) of 10% aqueous Na<sub>2</sub>S<sub>2</sub>O<sub>3</sub> and saturated aqueous NaHCO<sub>3</sub> (15 mL), followed by brine. The aqueous layer was extracted with ether. The combined organic layers were dried over anhydrous Na<sub>2</sub>SO<sub>4</sub> and concentrated. Silica gel chromatography (20% EtOAc/hexane) provided the ketone as a pale yellow oil (632 mg, 81%). [ $\alpha$ ]<sub>D</sub><sup>23</sup>-82 (c 0.22, CHCl<sub>3</sub>); IR(thin film): 2933, 2837, 2213, 1679, 1514, 1306 cm<sup>-1</sup>; <sup>1</sup>H-NMR (400 MHz, CDCl<sub>3</sub>)  $\delta$  7.87 (d, *J* = 7.3 Hz, 2H), 7.66 (t, *J* = 7.4 Hz, 1H), 7.56 (t, *J* = 7.8 Hz, 2H), 7.23 (d, *J* = 8.6 Hz, 2H), 6.87 (d, *J* = 8.6 Hz, 2H), 5.45 (d, *J* = 1.5 Hz 1H), 4.67 (d, *J* = 5.7 Hz, 1H), 4.64 (d, *J* = 11.5 Hz, 1H), 4.32 (d, *J* = 11.5 Hz, 1H), 4.26 (m, 1H), 4.12 (m, 1H), 4.02 (dd, *J* = 8.4, 4.3 Hz, 1H), 3.80 (s, 3H), 3.17-3.13 (m, 2H), 2.32 (d, *J* = 17.0 Hz, 1H), 2.21-2.04 (m, 3H), 1.71 (s, 3H); <sup>13</sup>C-NMR (100 MHz, CDCl<sub>3</sub>)  $\delta$  187.2, 159.6, 138.7, 133.9, 129.9, 129.7, 129.4, 128.7, 128.1, 119.4, 113.9, 94.7, 81.8, 81.6, 72.4, 63.9, 62.9, 55.3, 51.8, 34.5, 25.2, 22.9. MS(ESI): 491 (M<sup>+</sup> + Na), 443, 411, 181.

To a solution of the above ketone (1.46 g, 3.13 mmol) in THF (10 mL) at -78 °C was added L-Selectride (4.7 mL, 4.7 mmol; 1.0 M in THF) dropwise. The mixture was stirred at -78 °C for 30 min and then was quenched by saturated aqueous NH<sub>4</sub>Cl. The mixture was extracted with EtOAc. The combined organic

layers were washed with brine and dried over  $\text{Na}_2\text{SO}_4$  and evaporated. The residue was chromatographed over silica gel (40% EtOAc/hexane) to furnish the alcohol **15** as a colorless oil (1.27 g, 87%) as a single isomer.  $[\alpha]_{\text{D}}^{23}$ -54 (c 0.26,  $\text{CHCl}_3$ ); IR(thin film): 3469, 2928, 2637, 1612, 1513, 1446, 1304, 1248  $\text{cm}^{-1}$ ;  $^1\text{H-NMR}$  (400 MHz,  $\text{CDCl}_3$ )  $\delta$  7.86 (d,  $J = 8.2$  Hz, 2H), 7.64 (t,  $J = 6.9$  Hz, 1H), 7.56 (t,  $J = 7.1$  Hz, 2H), 7.24 (d,  $J = 8.6$  Hz, 2H), 6.87 (d,  $J = 8.6$  Hz, 2H), 5.39 (s, 1H), 4.64 (d,  $J = 11.1$  Hz, 1H), 4.51 (d,  $J = 11.1$  Hz, 1H), 4.42 (t,  $J = 4.9$  Hz, 1H), 4.32 (t,  $J = 4.9$  Hz, 1H), 4.20 (d,  $J = 15.9$  Hz, 1H), 4.08 (d,  $J = 15.9$  Hz, 1H), 3.79 (s, 3H), 3.64 (m, 1H), 3.19-3.05 (m, 2H), 2.62 (d,  $J = 4.4$  Hz, 1H), 2.16 (brs, 2H); 2.15-1.90 (m, 2H), 1.69 (s, 3H);  $^{13}\text{C-NMR}$  (100 MHz,  $\text{CDCl}_3$ )  $\delta$  159.5, 138.9, 133.7, 130.2, 129.8, 129.6, 129.3, 128.0, 119.4, 113.9, 85.4, 82.9, 78.9, 73.1, 64.5, 64.2, 63.3, 55.3, 52.2, 35.6, 24.2, 22.9. MS(ESI): 493 ( $\text{M}^+ + \text{Na}$ ), 351, 181.

**Acetal 16.** To a solution of alcohol **15** (1.27 g, 2.7 mmol) in THF (6 mL) at  $-40$   $^\circ\text{C}$  was added Red-Al (1.3 mL, 4.3 mmol; 65% w/w) dropwise. The mixture was warmed to  $-20$   $^\circ\text{C}$  and stirred for 1 h and then was quenched by 10% Roche's salt solution. The mixture was stirred at  $23$   $^\circ\text{C}$  for 2 h and then was extracted with EtOAc. The combined organic layers were washed with brine, dried over anhydrous  $\text{Na}_2\text{SO}_4$ , and concentrated. The residue was chromatographed over silica gel (40% EtOAc/hexane) to furnish the allylic alcohol as a colorless oil (1.03 g, 81%).  $^1\text{H-NMR}$  (500 MHz,  $\text{CDCl}_3$ )  $\delta$  7.89 (d,  $J$

= 7.3 Hz, 2H), 7.64 (t,  $J = 7.4$  Hz, 1H), 7.56 (t,  $J = 7.9$  Hz, 2H), 7.21 (dd,  $J = 6.7$ , 1.9 Hz, 2H), 6.87 (dd,  $J = 6.7$ , 1.9 Hz, 1H), 5.83 (ddd,  $J = 15.7$ , 5.2, 0.7 Hz, 1H), 5.73 (ddd,  $J = 15.7$ , 5.9, 1.0 Hz, 1H), 5.43 (s, 1H), 4.49 (dd,  $J = 16.3$ , 11.1 Hz, 2H), 4.18 (brs, 2H), 4.07 (m, 1H), 4.00 (m, 1H), 3.52 (ddd,  $J = 10.3$ , 5.4, 1.6 Hz, 1H), 3.19-3.11(m, 2H), 2.48 (brs, 1H), 2.05-1.95 (m, 2H), 1.90 (m, 1H), 1.88 (d,  $J = 14.5$  Hz, 1H), 1.72 (s, 3H);  $^{13}\text{C}$ -NMR (100 MHz,  $\text{CDCl}_3$ )  $\delta$  159.9, 139.4, 134.1, 133.8, 133.5, 131.7, 130.1, 129.7, 128.4, 120.1, 114.4, 79.6, 73.7, 73.5, 73.0, 66.0, 55.7, 52.6, 36.0, 24.2, 23.4. MS(ESI): 495 ( $\text{M}^+ + \text{Na}$ ), 353, 181.

To a solution of the above alcohol (354 mg, 0.79 mmol) in  $\text{CH}_2\text{Cl}_2$  (10 mL) was added trifluoroacetic acid (0.3 mL). After stirring at 23 °C for 1 h, the mixture was quenched by saturated aqueous  $\text{NaHCO}_3$ . The layers were separated and aqueous layer was extracted with  $\text{CH}_2\text{Cl}_2$ . The combined organic layers were dried over anhydrous  $\text{Na}_2\text{SO}_4$  and concentrated. The residue was dissolved in  $\text{CH}_2\text{Cl}_2$  (10 mL), *p*-methoxybenzylidene dimethylacetal (204 mg, 1.12 mmol) and CSA (5 mg) were sequentially added. The mixture was stirred at 23 °C for 30 min and then was quenched by  $\text{Et}_3\text{N}$  (2 drops). The mixture was concentrated. The residue was purified by silica gel chromatography (40% EtOAc/hexane) to afford the acetal **16** (a colorless oil, 250 mg, 71%) as a mixture of isomers (4.3 : 1, by  $^{13}\text{C}$  NMR). Major isomer:  $^1\text{H}$ -NMR (400 MHz,  $\text{CDCl}_3$ )  $\delta$  7.92 (d,  $J = 7.1$  Hz, 2H), 7.67 (t,  $J = 7.4$  Hz, 1H), 7.59 (t,  $J = 8.0$  Hz, 2H), 7.37 (d,  $J = 8.6$  Hz, 2H), 6.89 (d,  $J = 8.6$  Hz, 2H), 5.96 (dd,  $J = 15.5$ , 5.1 Hz, 1H), 5.86 (s, 1H), 5.80 (ddd,  $J = 15.5$ , 7.6, 1.3 Hz, 1H), 5.44 (s, 1H), 4.20-4.18 (m, 3H), 4.07 (m, 1H),

3.83 (m, 1H), 3.80 (s, 3H), 3.39 (m, 1H), 3.20 (m, 1H), 2.12-2.02 (m, 3H), 1.92 (d,  $J = 16.8$  Hz, 1H), 1.71 (s, 3H);  $^{13}\text{C-NMR}$  (125 MHz,  $\text{CDCl}_3$ )  $\delta$  160.9, 139.4, 136.8, 134.3, 131.6, 130.0, 129.8, 128.4, 128.4, 126.3, 120.1, 114.2, 103.7, 83.7, 79.4, 73.3, 66.1, 55.7, 53.7, 36.0, 25.7, 23.3. MS(ESI): 493 ( $\text{M}^+ + \text{Na}$ ), 335, 317, 181.

**Alcohol 3.** To a solution of acetal **16** (92 mg, 0.20 mmol) in  $\text{CH}_2\text{Cl}_2$  (10 mL) at  $-78$  °C was added DIBAL (0.6 mL, 0.6 mmol; 1.0 M in hexane) dropwise. The mixture was stirred at  $-78$  °C for 30 min and then was quenched by 10% Roche's salt solution. The mixture was stirred at  $23$  °C for 2 h. The layers were separated and the aqueous layer was extracted with  $\text{CH}_2\text{Cl}_2$ . The combined organic layers were dried over anhydrous  $\text{Na}_2\text{SO}_4$  and concentrated. The residue was purified by silica gel chromatography (40% EtOAc/hexane) to afford the alcohol **3** (a colorless oil, 68 mg, 74%) as a single regio isomer.  $[\alpha]_D^{23}$  -26 (c 0.97,  $\text{CHCl}_3$ ); IR(thin film): 3498, 2930, 2837, 1612, 1446, 1303, 1249  $\text{cm}^{-1}$ ;  $^1\text{H-NMR}$  (500 MHz,  $\text{CDCl}_3$ )  $\delta$  7.89 (d,  $J = 7.2$  Hz, 2H), 7.65 (t,  $J = 7.4$  Hz, 1H), 7.55 (t,  $J = 7.9$  Hz, 2H), 7.20 (d,  $J = 8.6$  Hz, 2H), 6.87 (d,  $J = 8.6$  Hz, 2H), 5.85 (dd,  $J = 15.8, 4.9$  Hz, 1H), 5.56 (dd,  $J = 15.8, 6.6$  Hz, 1H), 5.45 (s, 1H), 4.55 (d,  $J = 11.3$  Hz, 1H), 4.24 (d,  $J = 11.3$  Hz, 1H), 4.26 (s, 2H), 4.07 (m, 1H), 3.80 (s, 3H), 3.58-3.57 (m, 2H), 3.33 (m, 1H), 3.14 (m, 1H), 2.74 (brs, 1H), 2.06-2.04 (m, 2H), 1.94-1.89 (m, 2H), 1.74 (s, 3H);  $^{13}\text{C-NMR}$  (100 MHz,  $\text{CDCl}_3$ )  $\delta$  159.7, 139.5, 137.6, 134.1,

131.6, 130.1, 130.0, 129.7, 128.5, 126.8, 120.2, 114.3, 82.8, 73.2, 72.1, 70.4, 66.1, 55.7, 53.4, 36.0, 26.3, 23.4. MS(ESI): 495 ( $M^+ + Na$ ), 338, 181.

**Alcohol 17.** To a solution of the alcohol **3** (296 mg, 0.63 mmol) in THF (6 mL) at  $-78\text{ }^\circ\text{C}$  was added *n*BuLi (0.82 mL, 1.31 mmol; 1.6 M in hexane). The resulting orange suspension was stirred for 15 min. A solution of aldehyde **2** (90 mg, 0.205 mmol) was added dropwise. The resulting mixture was warmed to  $-40\text{ }^\circ\text{C}$  and stirred for 2 h before quenching with saturated aqueous  $\text{NH}_4\text{Cl}$ . The mixture was diluted with EtOAc and the layers were separated. The aqueous layer was extracted with EtOAc. The combined organic layers were washed with brine, dried over anhydrous  $\text{Na}_2\text{SO}_4$  and evaporated. The residue was chromatographed over silica gel (30% EtOAc/hexane) to furnish the hydroxy sulfone as a colorless oil (104 mg).

To a solution of the above hydroxysulfone in  $\text{CH}_2\text{Cl}_2$  (3 mL) was sequentially added  $\text{Et}_3\text{N}$  (0.1 mL, 0.684 mmol), DMAP (5 mg) and  $\text{Ac}_2\text{O}$  (55  $\mu\text{L}$ , 0.58 mmol). The resulting mixture was stirred at  $23\text{ }^\circ\text{C}$  for 3 h. The mixture was washed with saturated aqueous  $\text{NaHCO}_3$ , 1 M  $\text{NaHSO}_4$ , and brine. The aqueous layer was extracted with  $\text{CH}_2\text{Cl}_2$ . The combined organic layers were dried over anhydrous  $\text{Na}_2\text{SO}_4$  and evaporated to afford the diacetate as a colorless oil which was used for next reaction without further purification.

To a solution of the above diacetate in MeOH (3 mL) at  $-20\text{ }^\circ\text{C}$  was added  $\text{Na}_2\text{HPO}_4$  (64 mg, 0.45 mmol), followed by sodium amalgam (5% w/w, 750 mg).

The resulting suspension was vigorously stirred at -20 °C for 2 h. The mixture was warmed to 23 °C and stirred for 30 min. After this period, the mixture was quenched with saturated NH<sub>4</sub>Cl. The mixture was decanted. Water and 25% EtOAc/hexane was added. The layers were separated. The aqueous layer was extracted with 25% EtOAc/hexane. The combined organic layers were dried over anhydrous Na<sub>2</sub>SO<sub>4</sub> and evaporated. The residue was chromatographed over silica gel (10 % EtOAc/hexane) to furnish the *E*-isomer **17** (52 mg, 34%) along with *Z*-isomer (16 mg, 10%). *E*-isomer **17**:  $[\alpha]_d^{23}$ -56 (c 0.54, CHCl<sub>3</sub>); IR(thin film): 3503, 2926, 2855, 1513, 1035 cm<sup>-1</sup>; <sup>1</sup>H-NMR (400 MHz, CDCl<sub>3</sub>) δ 7.22 (d, *J* = 8.5 Hz, 2H), 6.85 (d, *J* = 8.5 Hz, 2H), 5.82 (dd, *J* = 15.9, 5.1 Hz, 1H), 5.78(m, 1H), 5.69-5.59 (m, 3H), 5.43 (s, 1H), 5.32 (dd, *J* = 15.4, 8.1 Hz, 1H), 4.83 (s, 1H), 4.79 (s, 1H), 4.66 (d, *J* = 6.6 Hz, 1H), 4.55 (d, *J* = 11.4 Hz, 1H), 4.47 (d, *J* = 6.6 Hz, 1H), 4.30 (m, 1H), 4.26 (d, *J* = 11.4 Hz, 1H), 4.19 (s, 2H), 4.11-4.06 (m, 2H), 3.79 (s, 3H), 3.75-3.64 (m, 4H), 3.56 (m, 1H), 3.32 (s, 3H), 2.70 (brs, 1H), 2.29 (m, 2H), 2.17-1.80 (m, 10H), 1.71 (s, 3H), 1.68-1.60 (m, 2H), 1.13 (m, 1H), 0.88 (s, 9H), 0.86 (d, *J* = 6.3 Hz, 3H), 0.04 (s, 6H); <sup>13</sup>C-NMR (100 MHz, CDCl<sub>3</sub>) δ 159.2, 144.2, 136.1, 132.6, 131.2, 130.0, 129.9, 129.8, 129.5, 127.2, 124.0, 119.7, 113.7, 113.3, 93.5, 82.0, 75.5, 73.0, 72.9, 69.9, 69.4, 65.6, 64.6, 59.8, 55.3, 55.2, 44.7, 42.8, 42.0, 36.7, 35.6, 35.5, 31.5, 26.5, 25.9, 22.9, 19.1, 18.3, -5.4. MS(ESI): 777 (M<sup>+</sup> + Na), 693, 383, 181. *Z*-isomer: <sup>1</sup>H-NMR (400 MHz, CDCl<sub>3</sub>) δ 7.22 (d, *J* = 8.5 Hz, 2H), 6.87 (m, 2H), 5.82 (dd, *J* = 15.9, 5.1 Hz, 1H), 5.78(m, 1H), 5.69-5.59 (m, 3H), 5.43 (s, 1H), 5.34 (t, *J* = 9.4 Hz, 1H), 4.86 (s,

1H), 4.80 (s, 1H), 4.64 (d,  $J = 6.8$  Hz, 1H), 4.54 (d,  $J = 11.4$  Hz, 1H), 4.45 (d,  $J = 6.8$  Hz, 1H), 4.29 (m, 1H), 4.27 (d,  $J = 11.4$  Hz, 1H), 4.19 (s, 2H), 4.08 (m, 1H), 3.80 (s, 3H), 3.79-3.50 (m, 4H), 3.43 (m, 1H), 3.31 (s, 3H), 2.67 (brs, 1H), 2.29 (m, 2H), 2.17-1.80 (m, 10H), 1.72 (s, 3H), 1.68-1.60 (m, 2H), 1.08 (m, 1H), 0.88 (s, 9H), 0.84 (d,  $J = 6.3$  Hz, 3H), 0.05 (s, 6H).

**Phosphonate 18.** To a mixture of Alcohol **17** (26 mg, 0.035 mmol) and bis-( $\beta,\beta,\beta$ -trifluoroethyl)phosphonoacetic acid (24.2 mg, 0.08 mmol) in THF (3 mL) was added sequentially  $i\text{Pr}_2\text{NEt}$  (28  $\mu\text{L}$ , 0.16 mmol) and 2, 4, 6-trichlorobenzoyl chloride (19  $\mu\text{L}$ , 0.10 mmol). The resulting mixture was stirred at 23 °C for 30 min. After this period, the mixture was concentrated and the residue was dissolved in benzene (3 mL). DMAP (27 mg, 0.24 mmol) was added. The resulting white suspension was stirred at 23°C for 30 min. The mixture was diluted with EtOAc and washed with saturated  $\text{NaHCO}_3$ , 1M  $\text{NaHSO}_4$  and brine. The aqueous was extracted with EtOAc. The combined organic layers were dried over anhydrous  $\text{Na}_2\text{SO}_4$  and evaporated. The residue was dissolve in AcOH-THF- $\text{H}_2\text{O}$  (3:1:1) (2 mL). The resulting mixture was stirred at 23°C for 3 h. The mixture was poured into water and extracted with 50% EtOAc/hexane (3 X 10 mL). The combined organic layer was washed with brine, dried over  $\text{Na}_2\text{SO}_4$  and evaporated. The residue was chromatographed over silica gel (40% EtOAc/hexane) to furnish the phosphonate **18** (32 mg, 100%) as a colorless oil.  $[\alpha]_d^{23}$ -88 ( $c$  0.08,  $\text{CHCl}_3$ ); IR(thin film): 3500, 2927, 1739, 1299, 1265, 1174,



1070  $\text{cm}^{-1}$ ;  $^1\text{H-NMR}$  (400 MHz,  $\text{CDCl}_3$ )  $\delta$  7.21 (d,  $J = 8.6$  Hz, 2H), 6.87 (d,  $J = 8.6$  Hz, 2H), 5.84 (dd,  $J = 15.7, 5.3$  Hz, 1H), 5.80 (m, 1H), 5.66 (m, 1H), 5.62 (dd,  $J = 15.7, 7.5$  Hz, 1H), 5.48 (dd,  $J = 15.4, 7.8$  Hz, 1H), 5.45 (s, 1H), 5.33 (dd,  $J = 15.4, 7.6$  Hz, 1H), 4.99 (m, 1H), 4.81 (s, 1H), 4.78 (s, 1H), 4.58 (d,  $J = 6.8$  Hz, 1H), 4.54 (d,  $J = 11.6$  Hz, 1H), 4.43-4.37 (m, 6H), 4.24 (d,  $J = 11.6$  Hz, 1H), 4.18 (s, 2H), 4.08-4.05 (m, 2H), 3.86-3.75 (m, 4H), 3.31 (s, 3H), 3.78 (s, 3H), 3.14 (dd,  $J = 20.7, 3.4$  Hz, 1H), 2.42 (m, 1H), 2.34-2.26 (m, 3H), 2.17-1.85 (m, 10H), 1.71 (s, 3H), 1.71-1.60 (m, 2H), 1.09 (m, 1H), 0.88 (d,  $J = 5.8$  Hz, 1H).  $^{13}\text{C-NMR}$  (100 MHz,  $\text{CDCl}_3$ )  $\delta$  164.3, 159.3, 144.0, 136.3, 133.9, 131.2, 129.8, 129.6, 129.3, 127.7, 126.2, 124.2, 119.7, 113.8, 93.5, 78.3, 76.7, 73.1, 70.8, 70.1, 65.6, 62.6, 60.6, 55.3, 55.2, 44.7, 42.2, 41.8, 35.8, 35.6, 34.5, 33.1, 31.0, 29.7, 26.7, 22.9, 19.3.

**Macrolactone 19 and 20.** To a solution of the above phosphonate **18** (30 mg, 0.035 mmol) in wet  $\text{CH}_2\text{Cl}_2$  (2.5 mL) was added Dess-Martin periodiane (40 mg, 0.094 mmol). After 10 min, the resulting white suspension was subjected to direct silica gel chromatography (25% EtOAc/hexane) to furnish the aldehyde (25.2 mg, 79%) as a colorless oil.

To a solution of 18-crown-6 (53 mg, 0.2 mmol) in toluene (27 mL) was added anhydrous  $\text{K}_2\text{CO}_3$  (27.6 mg, 0.2 mmol). The resulting suspension was stirred at  $23^\circ\text{C}$  for 3 h. The suspension was cooled to  $-20^\circ\text{C}$  and a solution of the above aldehyde in toluene (5 mL) was added dropwise. The mixture was stirred

at -20 °C for 30 min and then at 0°C for 2.5 h. The mixture was diluted with EtOAc, washed with water and brine, and the combined aqueous phase was extracted with EtOAc. The combined organic layers were dried over anhydrous Na<sub>2</sub>SO<sub>4</sub> and evaporated. Silica gel chromatography of the residue (10% EtOAc/hexane) afforded the *Z*-isomer **20** (5.2 mg) and *E*-isomer **19** (10 mg) (combined yield 84%). *Z*-isomer **20**:  $[\alpha]_d^{23}$ -120 (c 0.38, CHCl<sub>3</sub>); IR(thin film): 2924, 2852, 1719, 1513, 1248 cm<sup>-1</sup>; <sup>1</sup>H-NMR (400 MHz, CDCl<sub>3</sub>) δ 7.21 (d, *J* = 8.6 Hz, 2H), 6.85 (d, *J* = 8.6 Hz, 2H), 6.34 (m, 1H), 5.89 (d, *J* = 11.6 Hz, 1H), 5.83 (dd, *J* = 15.8, 5.5 Hz, 1H), 5.84 (m, 1H), 5.70 (d, *J* = 10.6 Hz, 1H), 5.62-5.53 (m, 2H), 5.43 (s, 1H), 5.40 (m, 1H), 5.06 (m, 1H), 4.82 (s, 1H), 4.76 (s, 1H), 4.64 (d, *J* = 6.8 Hz, 1H), 4.58 (d, *J* = 11.8 Hz, 1H), 4.46 (d, *J* = 6.8 Hz, 1H), 4.30 (d, *J* = 11.8 Hz, 1H), 4.19 (s, 2H), 4.15-4.06 (m, 3H), 3.86 (m, 1H), 3.80 (s, 3H), 3.61 (m, 1H), 3.31 (s, 3H), 2.44-1.81 (m, 12H), 1.70 (s, 3H), 1.50 (m, 1H), 1.21 (m, 1H), 1.14 (m, 1H), 0.84 (d, *J* = 6.8 Hz, 3H). <sup>13</sup>C-NMR (100 MHz, CDCl<sub>3</sub>) δ 165.7, 159.4, 147.5, 144.8, 135.9, 133.3, 131.7, 130.6, 129.6, 129.0, 126.9, 125.1, 121.9, 120.1, 114.1, 94.0, 79.7, 74.9, 74.2, 73.7, 72.0, 70.6, 67.6, 66.0, 55.7, 44.9, 43.1, 42.3, 36.1, 34.5, 33.3, 31.6, 28.7, 23.3, 20.2. MS(ESI): 685 (M<sup>+</sup> + Na), 601, 583. *E*-isomer **19**: <sup>1</sup>H-NMR (500 MHz, CDCl<sub>3</sub>) δ 7.24 (d, *J* = 8.6 Hz, 2H), 6.90 (m, 2H), 6.87 (d, *J* = 8.6 Hz, 1H), 5.86 (d, *J* = 17.0 Hz, 1H), 5.89-5.83 (m, 2H), 5.71-5.58 (m, 3H), 5.49 (dd, *J* = 15.5, 7.1 Hz, 1H), 5.45 (s, 1H), 5.14 (m, 1H), 4.84 (s, 1H), 4.77 (s, 1H), 4.65 (d, *J* = 6.8 Hz, 1H), 4.61 (d, *J* = 12.0 Hz, 1H), 4.47 (d, *J* = 6.8 Hz, 1H), 4.37 (m, 1H), 4.35 (d, *J*

= 12.0 Hz, 1H), 4.21 (brs, 1H), 4.15 (m, 1H), 4.10 (m, 1H), 3.89 (t,  $J = 6.2$  Hz, 1H), 3.82 (s, 3H), 3.70 (m, 1H), 3.30 (s, 3H), 2.56 (m, 1H), 2.36-2.16 (m, 5H), 2.04 (d,  $J = 14.9$  Hz, 1H), 1.95-1.77 (m, 6H), 1.73 (s, 3H), 1.55 (t,  $J = 12.9$  Hz, 1H), 1.07 (dd,  $J = 12.9, 10.5$  Hz, 1H), 0.89 (m, 1H), 0.80 (d,  $J = 5.7$  Hz, 3H).  $^{13}\text{C}$ -NMR (100 MHz,  $\text{CDCl}_3$ )  $\delta$  165.6, 159.5, 146.5, 145.0, 135.9, 135.0, 131.7, 130.7, 129.7, 129.2, 127.9, 127.0, 126.1, 123.4, 120.1, 114.1, 94.4, 79.8, 74.9, 74.5, 73.7, 72.0, 70.5, 66.0, 65.3, 55.7, 45.0, 43.9, 41.8, 36.9, 36.1, 32.7, 26.2, 23.3, 18.6. MS(ESI): 685 ( $\text{M}^+ + \text{Na}$ ), 601, 583.

**Isomerization of *E*-macrolactone 19.** A solution of macrolactone **19** (4.8 mg,  $7.3 \times 10^{-3}$  mmol) in  $\text{Et}_2\text{O}$  (3 mL) was irradiated under UV for 50 min in a Rayonet photochemical reactor. After this period, the mixture was concentrated. The residue was purified by silica gel chromatography (10%  $\text{EtOAc}$ /Hexanes) to furnish *Z*-macrolactone **20** (1.6 mg, 33%) along with *E*-macrolactone **19** (1.6 mg, 33%).

**Laulimalide 1.** A mixture of macrolactone **20** (15.6 mg, 0.024 mmol) and PPTS (81 mg, 0.32 mmol) in *tert*-butyl alcohol (1 mL) was heated at 83 °C for 8 h. The mixture was cooled to 23 °C and poured into water. The resulting mixture was extracted with 25%  $\text{EtOAc}$ /hexane (3 x 10 mL). The combined organic layers were washed with brine, dried over anhydrous  $\text{Na}_2\text{SO}_4$  and evaporated. The residue was chromatographed over silica gel eluting with 20%  $\text{EtOAc}$ /hexane

to furnish the allylic alcohol as a colorless oil (6.5 mg, 45%).  $[\alpha]_d^{23}$ -125 (*c* 0.14, CHCl<sub>3</sub>); IR(thin film): 3500, 2924, 1718, 1513, 1249 cm<sup>-1</sup>. <sup>1</sup>H-NMR (400 MHz, CDCl<sub>3</sub>)  $\delta$  7.22 (d, *J* = 8.6 Hz, 2H), 6.86 (d, *J* = 8.6 Hz, 2H), 6.31 (m, 1H), 5.91(d, *J* = 11.6 Hz, 1H), 5.84 (dd, *J* = 15.6, 6.2 Hz, 1H), 5.83 (m, 1H), 5.70 (d, *J* = 10.6 Hz, 1H), 5.63-5.58 (m, 3H), 5.43 (s, 1H), 5.06 (m, 1H), 4.84 (s, 2H), 4.59 (d, *J* = 11.8 Hz, 1H), 4.31 (d, *J* = 11.8 Hz, 1H), 4.19 (s, 2H), 4.15-4.06 (m, 3H), 3.85 (m, 1H), 3.80 (s, 3H), 3.55 (m, 1H), 2.33-1.76 (m, 12H), 1.65 (s, 3H), 1.60-1.58 (m, 2H), 1.28-1.21 (m, 2H), 1.12 (m, 1H), 0.79 (d, *J* = 6.8 Hz, 3H). MS(ESI): 641 (M<sup>+</sup> + Na), 601, 583, 463.

To a suspension of powdered 4 Å molecular sieves (50 mg) in CH<sub>2</sub>Cl<sub>2</sub> (1 mL) at -20 °C were sequentially added diethyl D-tartrate (16.4 mg, 0.08 mmol) and Ti(O*i*Pr)<sub>4</sub> (20  $\mu$ l, 0.067 mmol). The resulting mixture was stirred for 15 min at -20 °C, and then *tert*-butyl hydroperoxide (20  $\mu$ l, 0.13 mmol; 6.7 M in *n*-decane) was added dropwise. The mixture was stirred for 15 min and then a solution of the above alcohol (6.5 mg, 0.011 mmol) in CH<sub>2</sub>Cl<sub>2</sub> (2 mL) was added dropwise. The resulting mixture was stirred for 1 h at -20 °C. After this period, a mixture of 4 N NaOH (1 mL) and brine (1 mL) was added and the resulting mixture was stirred at 0 °C for 1 h. The layers were separated. The aqueous layer was extracted with CH<sub>2</sub>Cl<sub>2</sub>. The combined organic layers were washed with brine, dried over anhydrous Na<sub>2</sub>SO<sub>4</sub> and concentrated to give a residue which was used for next reaction immediately. An analytical sample was isolated by silica gel chromatography (20% EtOAc/hexanes). <sup>1</sup>H-NMR (400 MHz, CDCl<sub>3</sub>)  $\delta$  7.21 (d, *J*

= 8.6 Hz, 2H), 6.86 (dd,  $J = 6.8, 2.0$  Hz, 2H), 6.42 (dt,  $J = 11.3, 3.6$  Hz, 1H), 5.91-5.81(m, 3H), 5.68 (d,  $J = 10.2$  Hz, 1H), 5.59 (ddd,  $J = 15.8, 6.9, 1.1$  Hz, 1H), 5.43 (s, 1H), 5.21 (dd,  $J = 10.4, 5.1$  Hz, 1H), 4.84 (s, 1H), 4.83 (s, 1H), 4.59 (d,  $J = 11.7$  Hz, 1H), 4.32 (d,  $J = 11.7$  Hz, 1H), 4.30 (m, 1H), 4.19 (s, 2H), 4.09-4.03 (m, 3H), 3.87 (t,  $J = 6.0$  Hz, 1H), 3.80 (s, 3H), 3.75 (m, 1H), 3.04 (m, 1H), 2.87 (t,  $J = 2.5$  Hz, 1H), 2.40-1.74 (m, 12H), 1.59 (s, 3H), 1.45-1.30 (m, 3H), 0.82 (d,  $J = 6.3$  Hz, 3H).

To a suspension of the above epoxide in  $\text{CH}_2\text{Cl}_2$  (1 mL) and pH 7 buffer (50  $\mu\text{l}$ ) was added DDQ (8 mg, 0.0352 mmol). The green mixture was stirred at 23 °C for 2 h. The resulting orange suspension was then washed with saturated aqueous  $\text{NaHCO}_3$ . The aqueous layer was extracted with  $\text{CH}_2\text{Cl}_2$ . The combined organic layers were dried over anhydrous  $\text{Na}_2\text{SO}_4$  and evaporated. The residue was chromatographed over silica gel eluting with 25% EtOAc/hexane to give laulimalide **1** as a colorless oil (2.6 mg, 48%).  $[\alpha]_{\text{D}}^{23} -196$  (c 0.23,  $\text{CHCl}_3$ ); IR(thin film): 3427, 2923, 1716, 1644, 1167  $\text{cm}^{-1}$ ;  $^1\text{H-NMR}$  (400 MHz,  $\text{CDCl}_3$ )  $\delta$  6.45 (m, 1H), 5.91 (d,  $J = 10.3$  Hz, 1H), 5.84 (ddd,  $J = 16.2, 5.3, 0.9$  Hz, 1H), 5.83 (m, 1H), 5.74 (ddd,  $J = 16.2, 6.2, 0.9$  Hz, 1H), 5.69 (brd,  $J = 10.1$  Hz, 1H), 5.42 (s, 1H), 5.16 (ddd,  $J = 11.2, 5.2, 1.6$  Hz, 1H), 4.86 (s, 1H), 4.85 (s, 1H), 4.31 (brd,  $J = 9.1$  Hz, 1H), 4.22 (m, 1H), 4.17 (brs, 2H), 4.07 (m, 1H), 4.03 (m, 1H), 3.76 (m, 1H), 3.72 (m, 1H), 3.08 (m, 1H), 2.90 (t,  $J = 2.6$  Hz, 1H), 2.38 (m, 1H), 2.36 (m, 1H), 2.22 (m, 1H), 2.12 (brd,  $J = 15.7$  Hz, 1H), 2.02-1.72 (m, 6H), 1.69 (s, 3H), 1.49 (m, 1H), 1.45 (m, 1H), 1.33 (m, 1H), 0.82 (d,  $J = 6.3$  Hz, 3H);  $^{13}\text{C-}$

NMR (125 MHz, CDCl<sub>3</sub>)  $\delta$  166.5, 150.7, 145.3, 134.3, 131.6, 129.1, 128.9, 125.6, 120.9, 120.1, 113.0, 73.9, 73.5, 73.4, 72.7, 68.3, 67.0, 66.1, 61.1, 52.5, 46.0, 43.8, 37.5, 36.0, 34.2, 33.8, 32.1, 29.9, 23.3, 21.2. MS(ESI): 515 (M<sup>+</sup> + H), 497, 479, 181.

Proton standard parameters. BBI probe

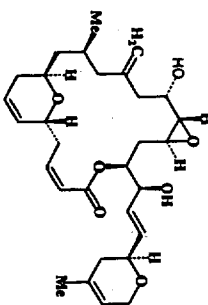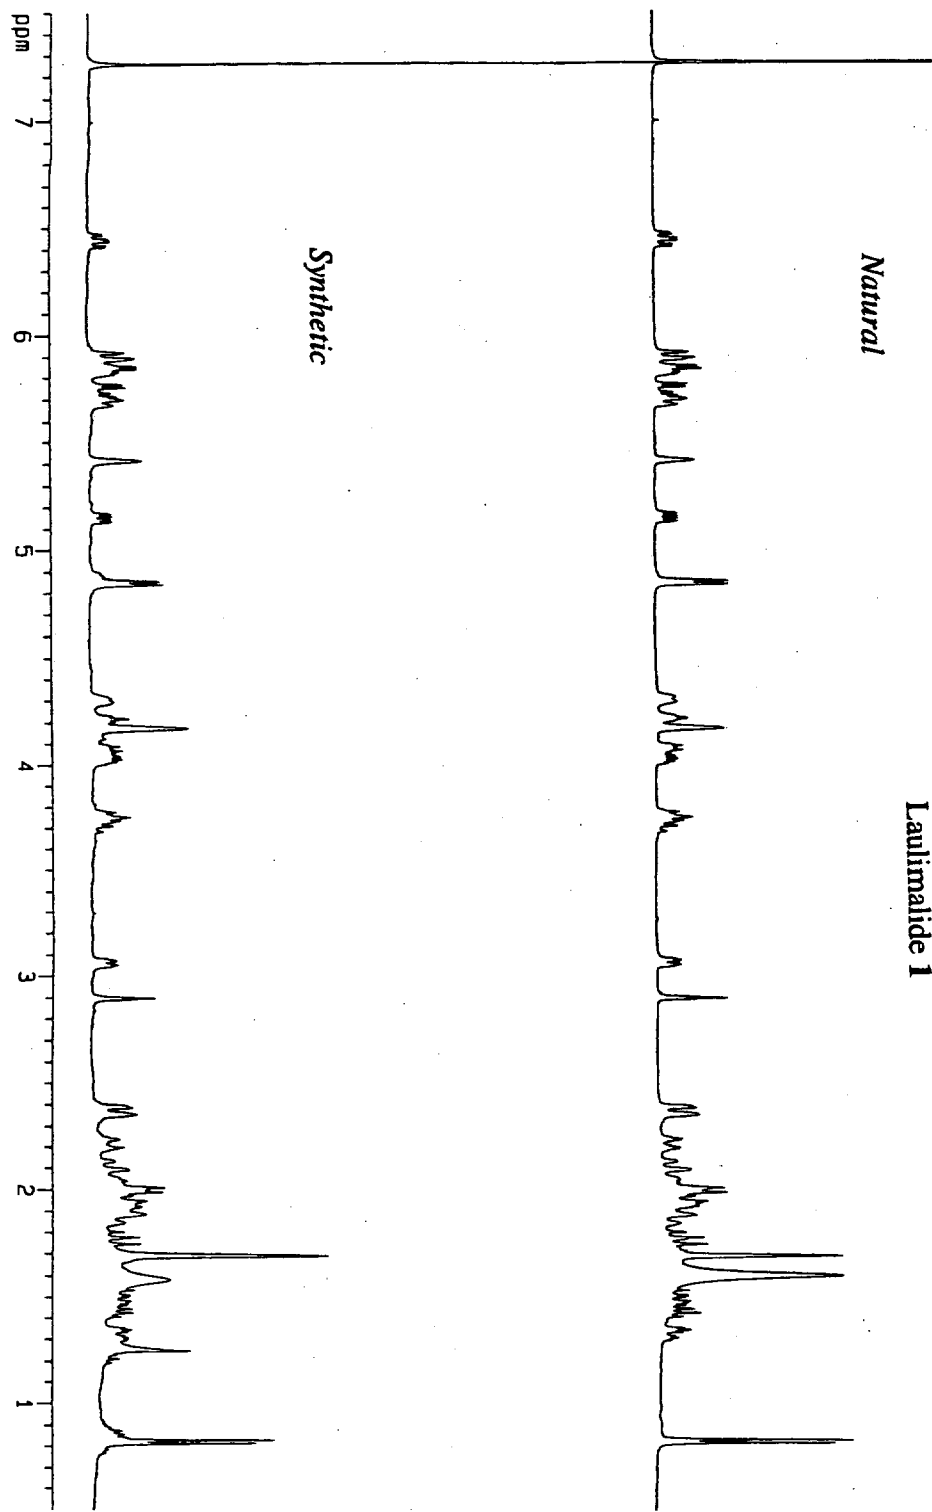

Current Data Parameters  
 NAME N928  
 EXPNO 1  
 PROCNO 1

F2 - Acquisition Parameters  
 Date\_ 20000923  
 Time 19.11

INSTRUM spect  
 PROBDI 5 mm BBI 1H-B  
 PULPROG zg  
 TD 16384  
 SOLVENT CDCl3  
 NS 16  
 DS 2  
 SMH 4789.272 Hz  
 FIDRES 0.292314 Hz  
 AQ 1.7105396 sec  
 RG 128  
 DM 104.400 usec  
 DE 6.00 usec  
 TE 300.0 K  
 D1 1.00000000 sec  
 P1 4.00 usec  
 SF01 400.1342000 MHz  
 NUC1 1H  
 PL1 0.00 dB

F2 - Processing parameters  
 SI 8192  
 SF 400.1320090 MHz  
 MDW EM  
 SSB 0  
 LB 0.10 Hz  
 GB 0  
 PC 1.00

1D NMR plot parameters  
 CX 20.00 cm  
 F1P 7.500 ppm  
 F1 3000.99 Hz  
 F2P 0.500 ppm  
 F2 200.07 Hz  
 PPMCM 0.35000 ppm/cm  
 HZCM 140.04620 Hz/cm

Carbon-13 standard parameters, BBO probe

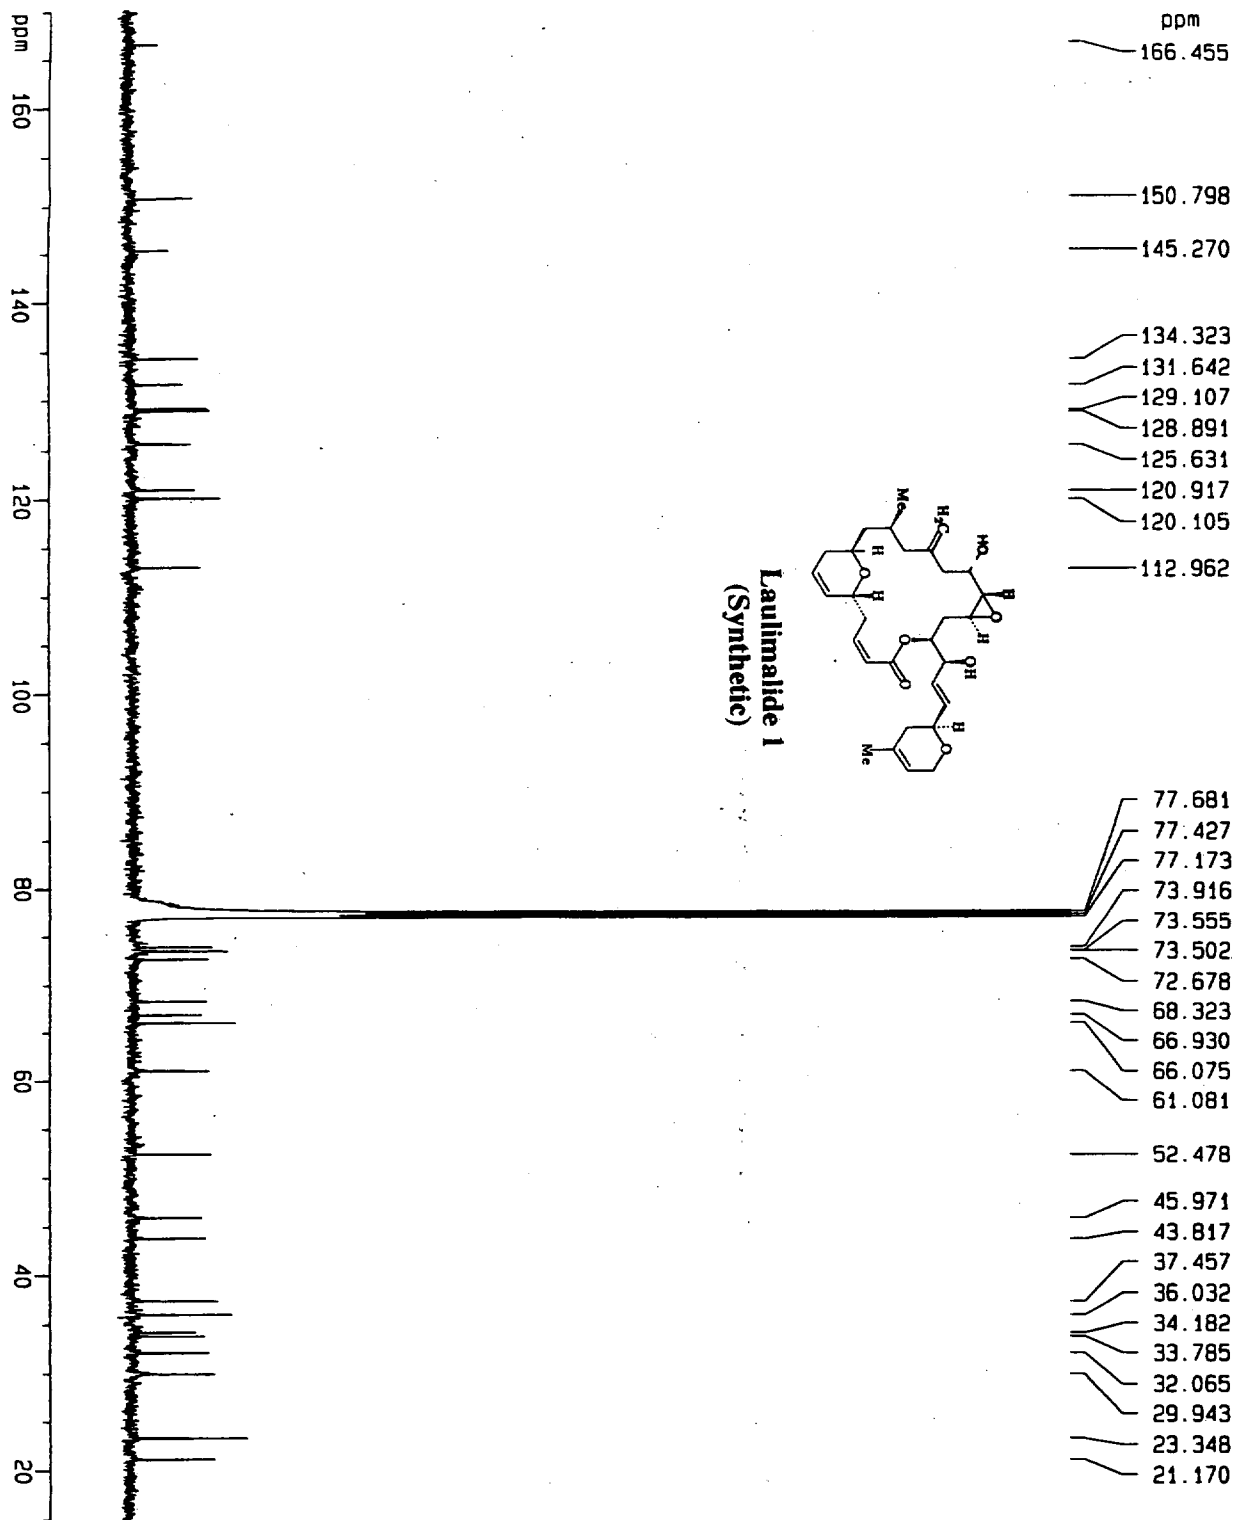

- 166.455
- 150.798
- 145.270
- 134.323
- 131.642
- 129.107
- 128.891
- 125.631
- 120.917
- 120.105
- 112.962
- 77.681
- 77.427
- 77.173
- 73.916
- 73.555
- 73.502
- 72.678
- 68.323
- 66.930
- 66.075
- 61.081
- 52.478
- 45.971
- 43.817
- 37.457
- 36.032
- 34.182
- 33.785
- 32.065
- 29.943
- 23.348
- 21.170

|                             |                 |
|-----------------------------|-----------------|
| Current Data Parameters     |                 |
| NAME                        | N922            |
| EXPNO                       | 2               |
| PROCNO                      | 1               |
| F2 - Acquisition Parameters |                 |
| Date_                       | 20000921        |
| Time                        | 12.15           |
| INSTRUM                     | spect           |
| PROBHD                      | 5 mm BBO BB-1   |
| PULPROG                     | zgpg            |
| TD                          | 32768           |
| SOLVENT                     | CDCl3           |
| NS                          | 8956            |
| DS                          | 2               |
| SMH                         | 30303.031 Hz    |
| FIDRES                      | 0.924775 Hz     |
| AQ                          | 0.5407220 sec   |
| RG                          | 13004           |
| DM                          | 16.500 usec     |
| DE                          | 6.00 usec       |
| TE                          | 300.0 K         |
| d11                         | 0.03000000 sec  |
| d12                         | 0.00002000 sec  |
| PL13                        | 22.00 dB        |
| D1                          | 2.00000000 sec  |
| CPDPRG2                     | wait216         |
| PCPD2                       | 80.00 usec      |
| SFO2                        | 500.1320000 MHz |
| NUC2                        | 1H              |
| PL2                         | 3.00 dB         |
| PL12                        | 22.00 dB        |
| P1                          | 3.80 usec       |
| SFO1                        | 125.7715724 MHz |
| NUC1                        | 13C             |
| PL1                         | 3.00 dB         |
| F2 - Processing Parameters  |                 |
| SI                          | 32768           |
| SF                          | 125.7577390 MHz |
| MDM                         | EM              |
| SSB                         | 0               |
| LB                          | 3.00 Hz         |
| GB                          | 0               |
| PC                          | 1.40            |
| 1D NMR plot parameters      |                 |
| CX                          | 20.00 cm        |
| F1P                         | 170.000 ppm     |
| F1                          | 21378.81 Hz     |
| F2P                         | 15.000 ppm      |
| F2                          | 1886.37 Hz      |
| PPMCM                       | 7.75000 ppm/cm  |
| HZCM                        | 974.62244 Hz/cm |



Proton standard parameters, BBO probe

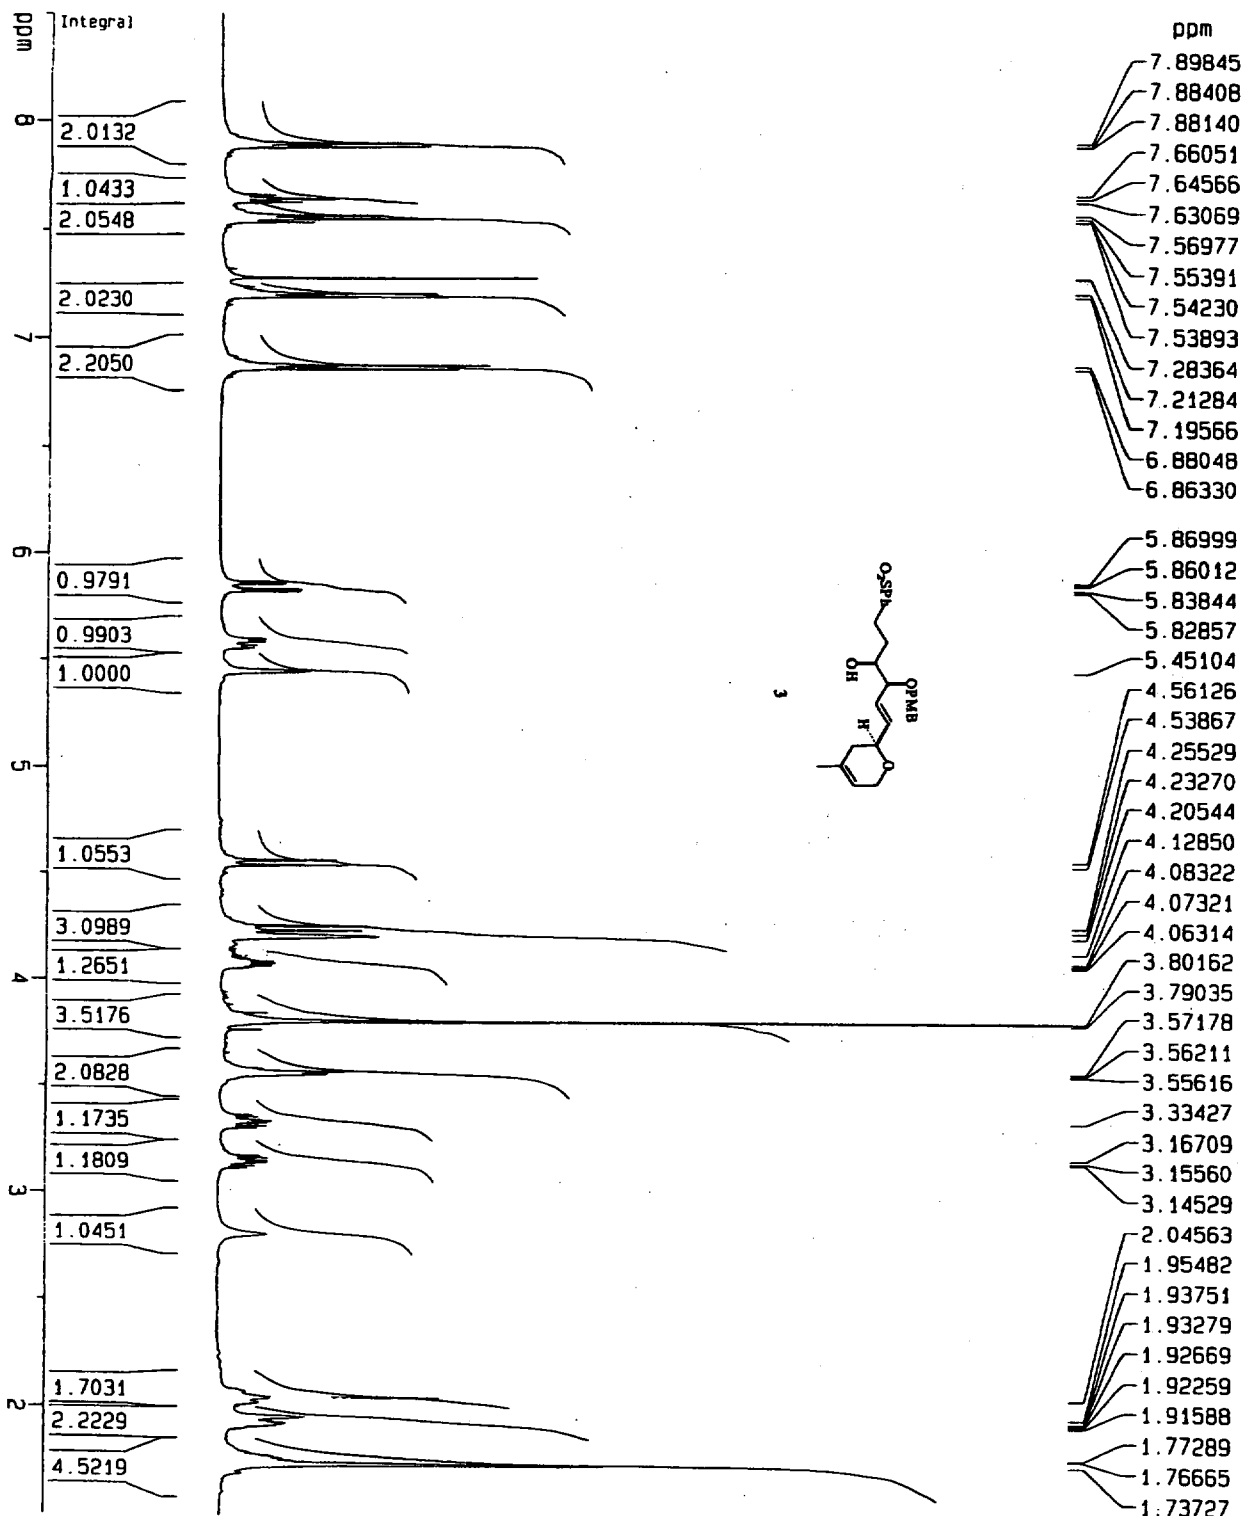

Current Data Parameters

|        |   |
|--------|---|
| NAME   | 3 |
| EXPNO  | 1 |
| PROCNO | 1 |

F2 - Acquisition Parameters

|         |                 |
|---------|-----------------|
| Date_   | 20000627        |
| Time    | 17.48           |
| INSTRUM | spect           |
| PROBHD  | 5 mm BBO BB-1   |
| PULPROG | zg              |
| TD      | 32768           |
| SOLVENT | CDCl3           |
| NS      | 8               |
| DS      | 2               |
| SWH     | 6009.615 Hz     |
| FIDRES  | 0.183399 Hz     |
| AQ      | 2.7263477 sec   |
| RG      | 25.4            |
| DW      | 83.200 usec     |
| DE      | 6.00 usec       |
| TE      | 300.0 K         |
| D1      | 1.00000000 sec  |
| P1      | 5.00 usec       |
| SFO1    | 500.1327507 MHz |
| NUC1    | 1H              |
| PL1     | 3.00 dB         |

F2 - Processing parameters

|     |                 |
|-----|-----------------|
| SI  | 16384           |
| SF  | 500.1300000 MHz |
| MCM | EM              |
| SSB | 0               |
| LB  | 0.20 Hz         |
| GB  | 0               |
| PC  | 1.00            |

10 NMR plot parameters

|       |                 |
|-------|-----------------|
| CX    | 20.00 cm        |
| FIP   | 8.500 ppm       |
| F1    | 4251.10 Hz      |
| F2P   | 1.500 ppm       |
| F2    | 750.20 Hz       |
| PPMCM | 0.35000 ppm/cm  |
| MZCM  | 175.04550 Hz/cm |

Carbon-13 standard parameters, BBO probe

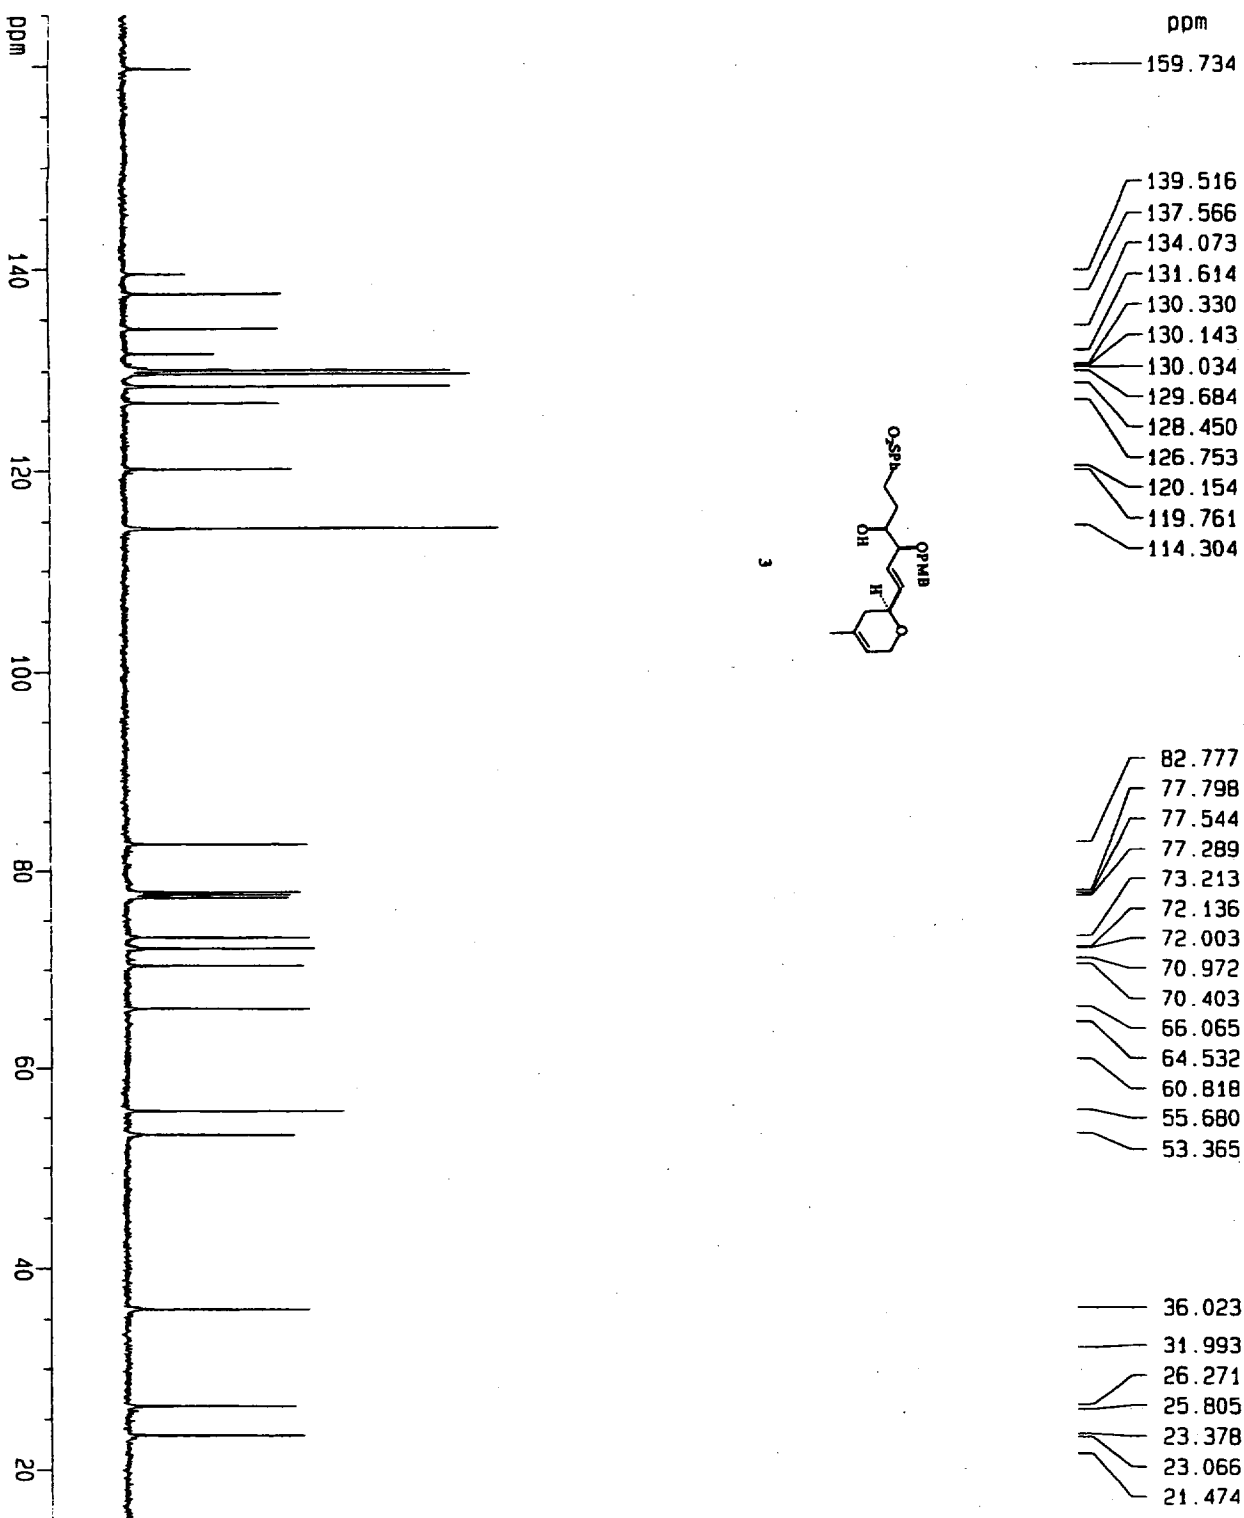

Current Data Parameters

|        |   |
|--------|---|
| NAME   | 3 |
| EXPNO  | 2 |
| PROCNO | 1 |

F2 - Acquisition Parameters

|         |                 |
|---------|-----------------|
| Date_   | 20000627        |
| Time    | 17:52           |
| INSTRUM | spect           |
| PROBHD  | 5 mm BBO BB-1   |
| PULPROG | zgpg            |
| TD      | 32768           |
| SOLVENT | CDCl3           |
| NS      | 86              |
| DS      | 2               |
| SMH     | 30303.031 HZ    |
| FIDRES  | 0.924775 HZ     |
| AD      | 0.5407220 sec   |
| RG      | 8192            |
| DM      | 16.500 usec     |
| DE      | 6.00 usec       |
| TE      | 300.0 K         |
| d11     | 0.03000000 sec  |
| d12     | 0.00002000 sec  |
| PL13    | 22.00 dB        |
| D1      | 2.00000000 sec  |
| CPDPRG2 | waltz16         |
| PCPD2   | 80.00 usec      |
| SFO2    | 500.1320000 MHz |
| NUC2    | 1H              |
| PL2     | 3.00 dB         |
| PL12    | 22.00 dB        |
| P1      | 3.00 usec       |
| SFO1    | 125.7715724 MHz |
| NUC1    | 13C             |
| PL1     | 0.00 dB         |

F2 - Processing Parameters

|     |                 |
|-----|-----------------|
| SI  | 32768           |
| SF  | 125.7577390 MHz |
| WDW | EM              |
| SSB | 0               |
| LB  | 3.00 HZ         |
| GB  | 0               |
| PC  | 1.40            |

1D NMR plot parameters

|       |                 |
|-------|-----------------|
| CX    | 20.00 cm        |
| F1P   | 165.000 PPM     |
| F1    | 20750.03 HZ     |
| F2P   | 15.000 PPM      |
| F2    | 1886.37 HZ      |
| PPMCM | 7.50000 PPM/cm  |
| HZCM  | 943.18292 HZ/cm |

Proton standard parameters. B80 probe

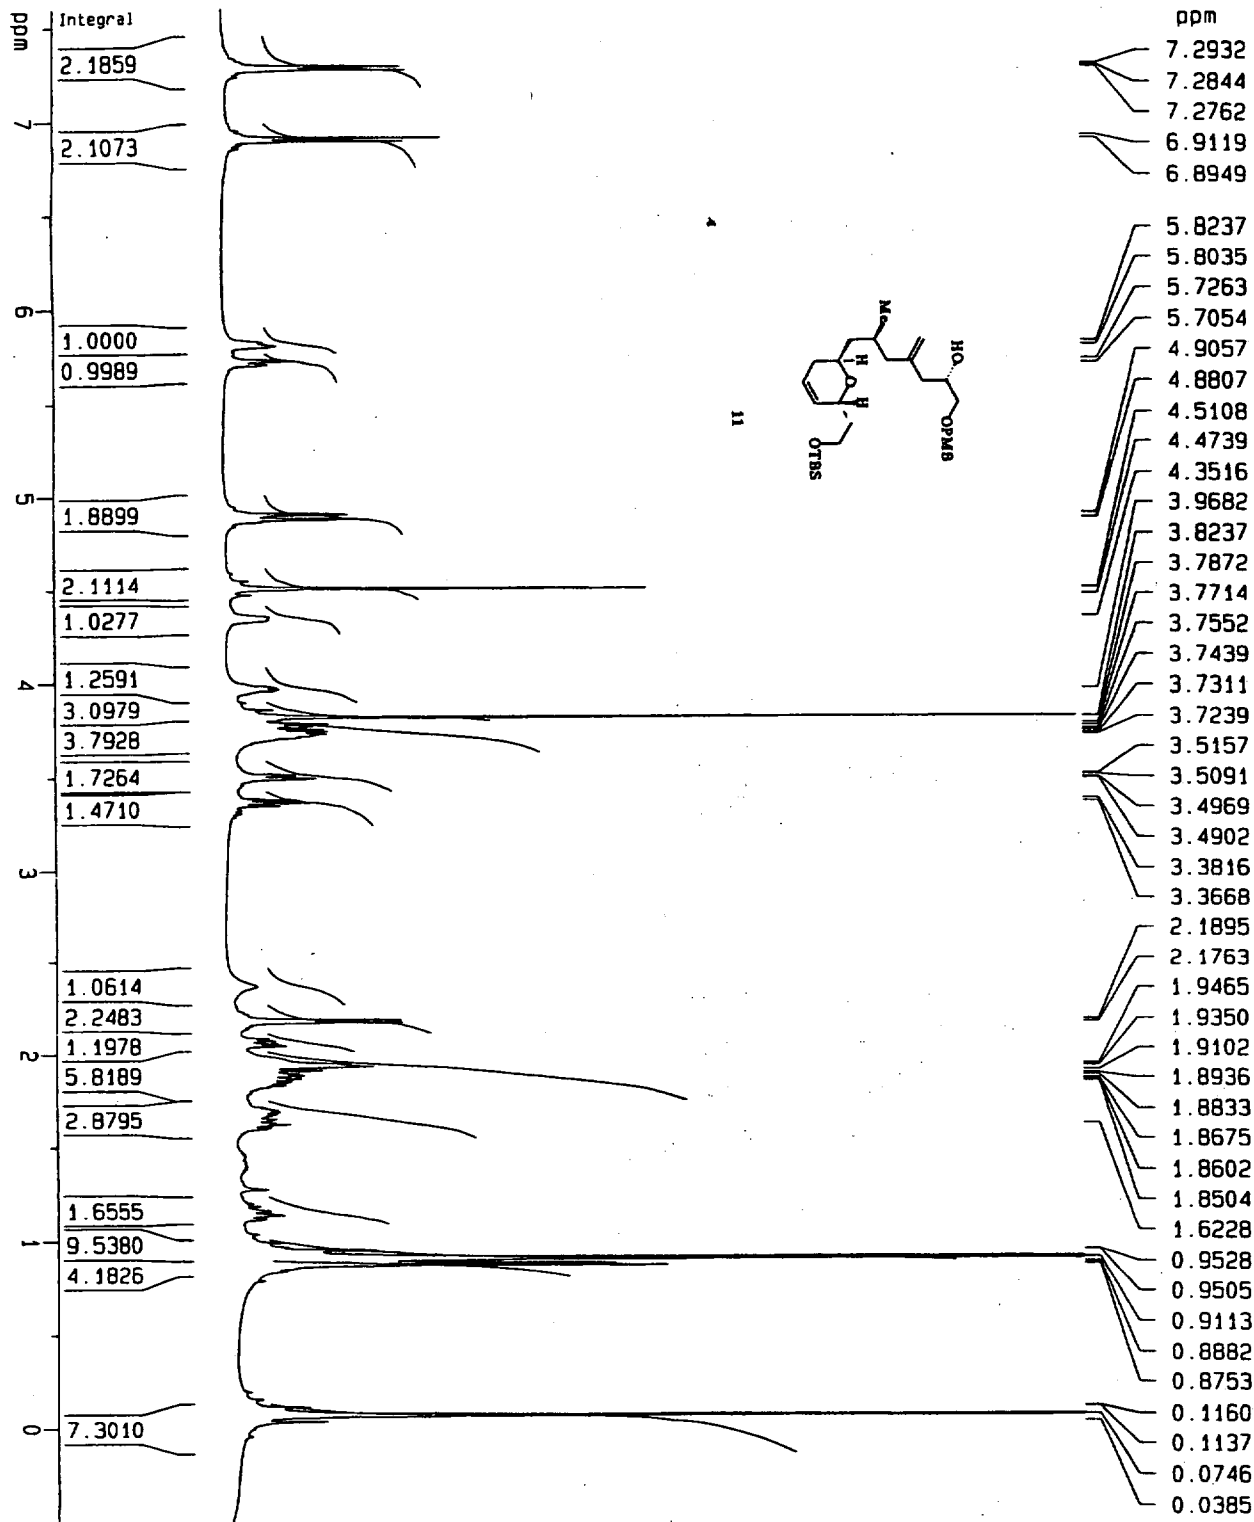

Current Data Parameters  
 NAME L100  
 EXPNO 1  
 PROCNO 1

F2 - Acquisition Parameters

Date 20000326  
 Time 17.14  
 INSTRUM spect  
 PROBHD 5 mm BBO BB-1H  
 PULPROG zg  
 TD 32768  
 SOLVENT CDCl3  
 NS 8  
 DS 2  
 SMH 6009.615 Hz  
 FIDRES 0.183399 Hz  
 AQ 2.7263477 sec  
 RG 20.2  
 DM B3.200 usec  
 DE 6.00 usec  
 TE 300.0 K  
 D1 1.00000000 sec  
 P1 5.50 usec  
 SF01 500.1327507 MHz  
 NUC1 1H  
 PL1 0.00 dB

F2 - Processing Parameters

SI 16384  
 SF 500.1300000 MHz  
 MDM EM  
 SSB 0  
 LB 0.20 Hz  
 GB 0  
 PC 1.00

1D NMR plot parameters

CX 20.00 cm  
 F1P 7.600 ppm  
 F1 3800.99 Hz  
 F2P -0.500 ppm  
 F2 -250.07 Hz  
 PPMCM 0.40500 ppm/cm  
 HZCM 202.55266 Hz/cm

Carbon-13 standard parameters, BBO probe

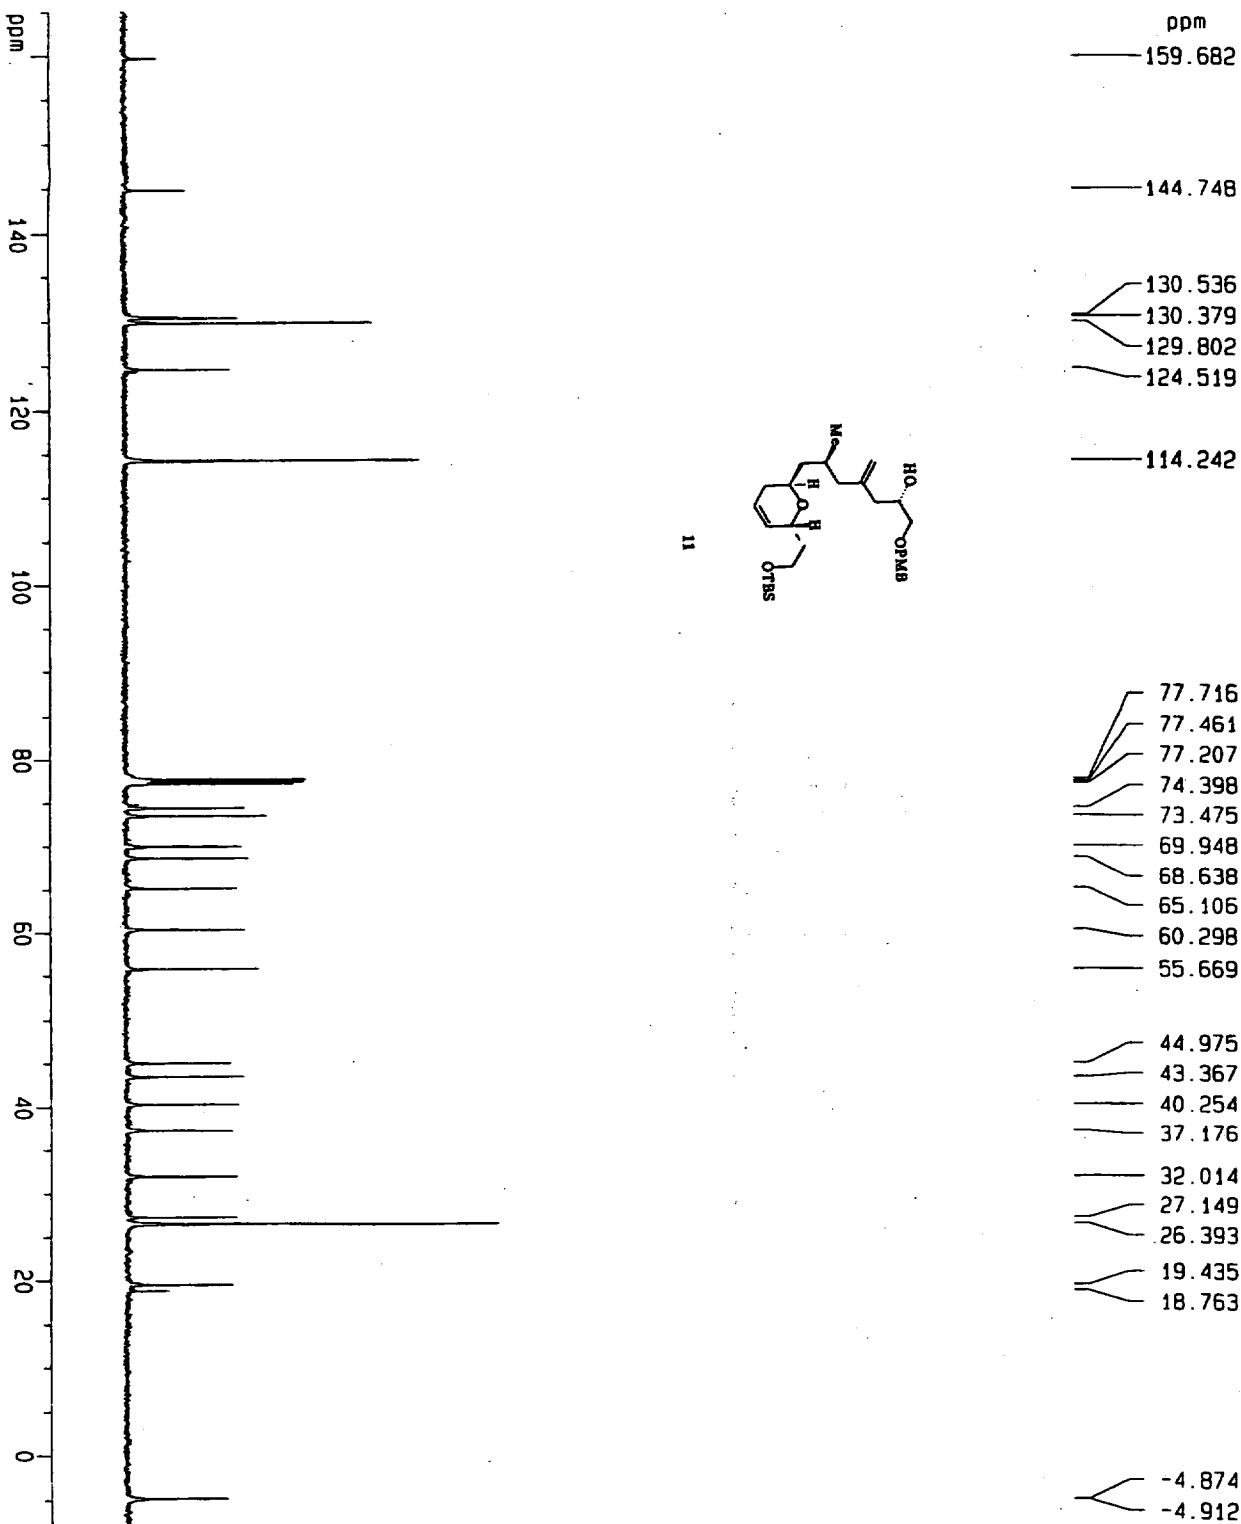

Current Data Parameters

NAME L100  
 EXPNO 2  
 PROCNO 1

F2 - Acquisition Parameters

Date\_ 20000326  
 Time 17.23  
 INSTRUM spect  
 PROBHD 5 mm BBO BB-1H  
 PULPROG zgpg  
 TO 32768  
 SOLVENT CDCl3  
 NS 256  
 DS 2  
 SMH 30303.031 Hz  
 FIDRES 0.924775 Hz  
 AQ 0.5407220 sec  
 RG 8192  
 DM 16.500 usec  
 DE 6.00 usec  
 TE 300.0 K  
 d11 0.03000000 sec  
 d12 0.00002000 sec  
 PL13 17.20 dB  
 D1 2.00000000 sec  
 CPDPRG2 waltz16  
 PCPD2 80.00 usec  
 SF02 500.1320000 MHz  
 NUC2 1H  
 PL2 0.00 dB  
 PL12 17.20 dB  
 P1 3.00 usec  
 SF01 125.7715724 MHz  
 NUC1 13C  
 PL1 0.00 dB

F2 - Processing parameters

SI 32768  
 SF 125.7577390 MHz  
 NQM EM  
 SSB 0  
 LB 3.00 Hz  
 GB 0  
 PC 1.40

10 NMR plot parameters

CX 20.00 cm  
 F1P 165.000 ppm  
 F1 20750.03 Hz  
 F2P -8.000 ppm  
 F2 -1006.06 Hz  
 PPMCM 8.65000 ppm/cm  
 HZCM 1087.80457 Hz/cm

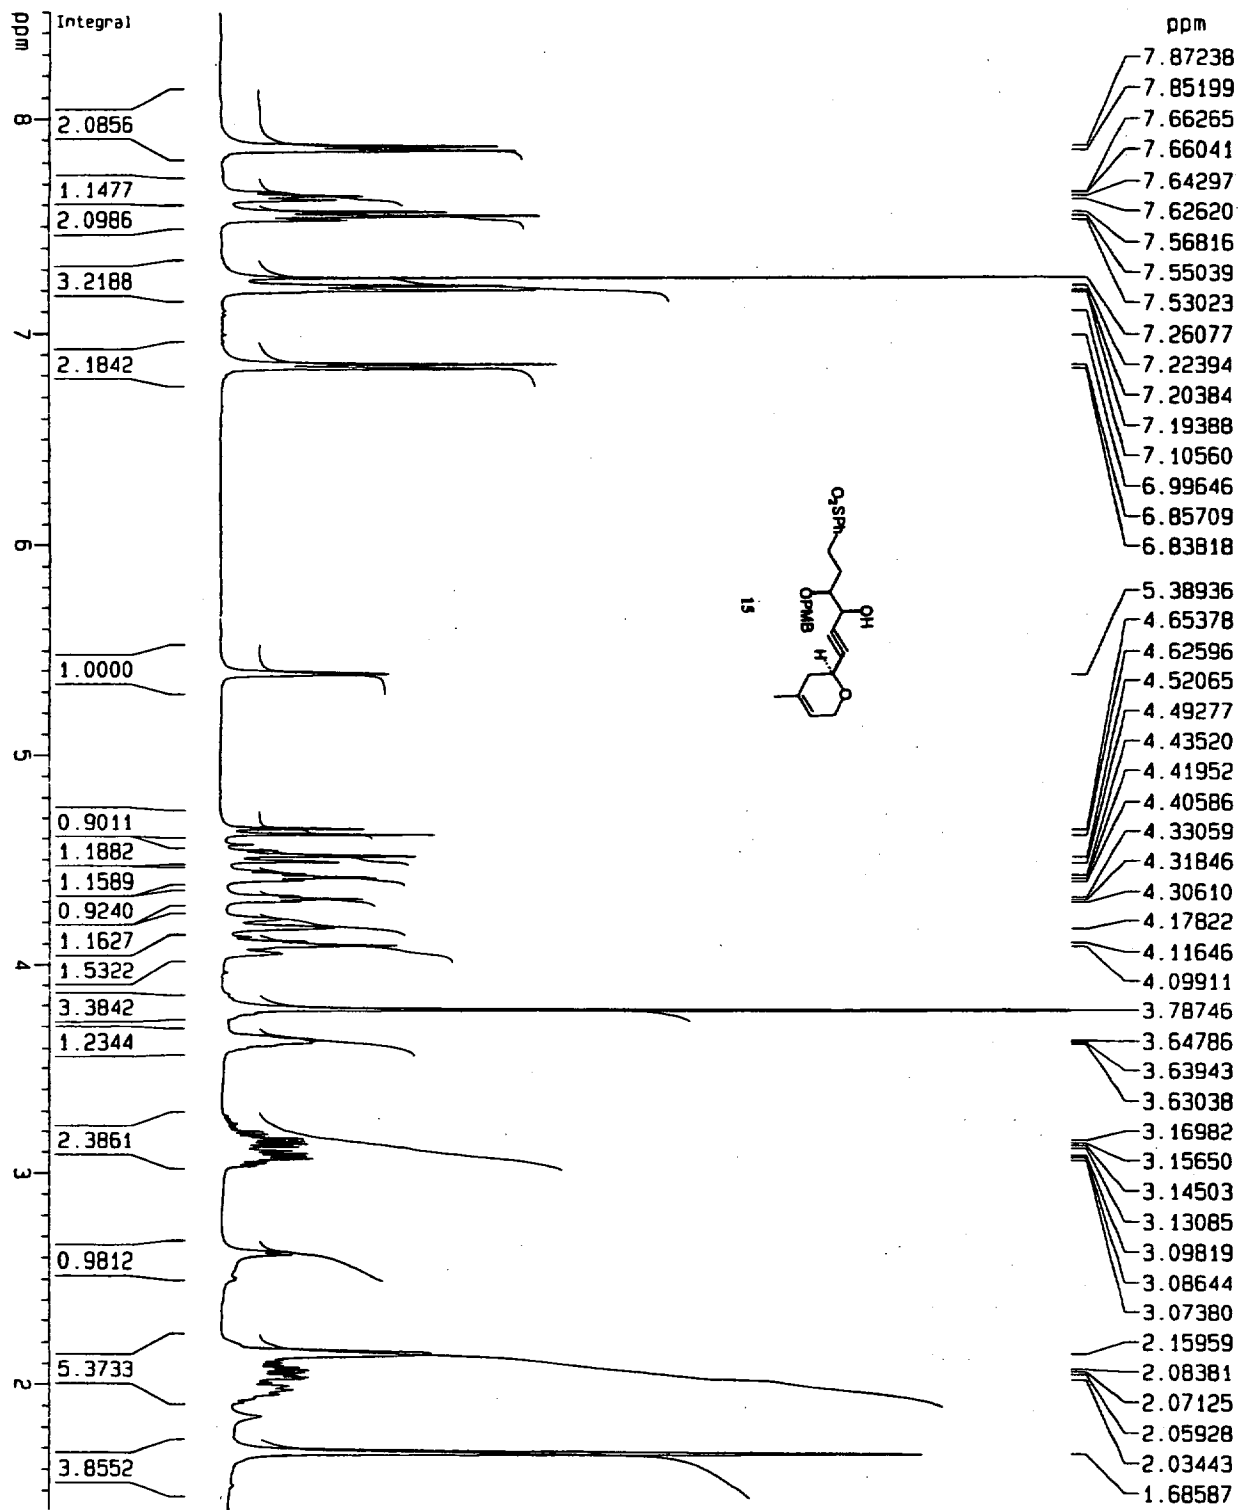

Proton standard parameters, BBI probe

Current Data Parameters  
 NAME M156  
 EXPNO 1  
 PROCNO 1

F2 - Acquisition Parameters  
 Date\_ 20000624  
 Time 17.39  
 INSTRUM spect  
 PROBHD 5 mm BBI 1H-B  
 PULPROG zg  
 TD 16384  
 SOLVENT CDCl3  
 NS 8  
 DS 2  
 SMH 4789.272 Hz  
 FIDRES 0.292314 Hz  
 AQ 1.7105396 sec  
 RG 16  
 DW 104.400 usec  
 DE 6.00 usec  
 TE 300.0 K  
 D1 1.00000000 sec  
 P1 4.00 usec  
 SF01 400.1342000 MHz  
 NUC1 1H  
 PL1 0.00 dB

F2 - Processing parameters  
 SI 8192  
 SF 400.1320090 MHz  
 MDW EM  
 SSB 0  
 LB 0.10 Hz  
 GB 0  
 PC 1.00

1D NMR plot parameters  
 CX 20.00 cm  
 F1P 8.500 ppm  
 F1 3401.12 Hz  
 F2P 1.400 ppm  
 F2 560.18 Hz  
 PPMCM 0.35500 ppm/cm  
 HZCM 142.04686 Hz/cm

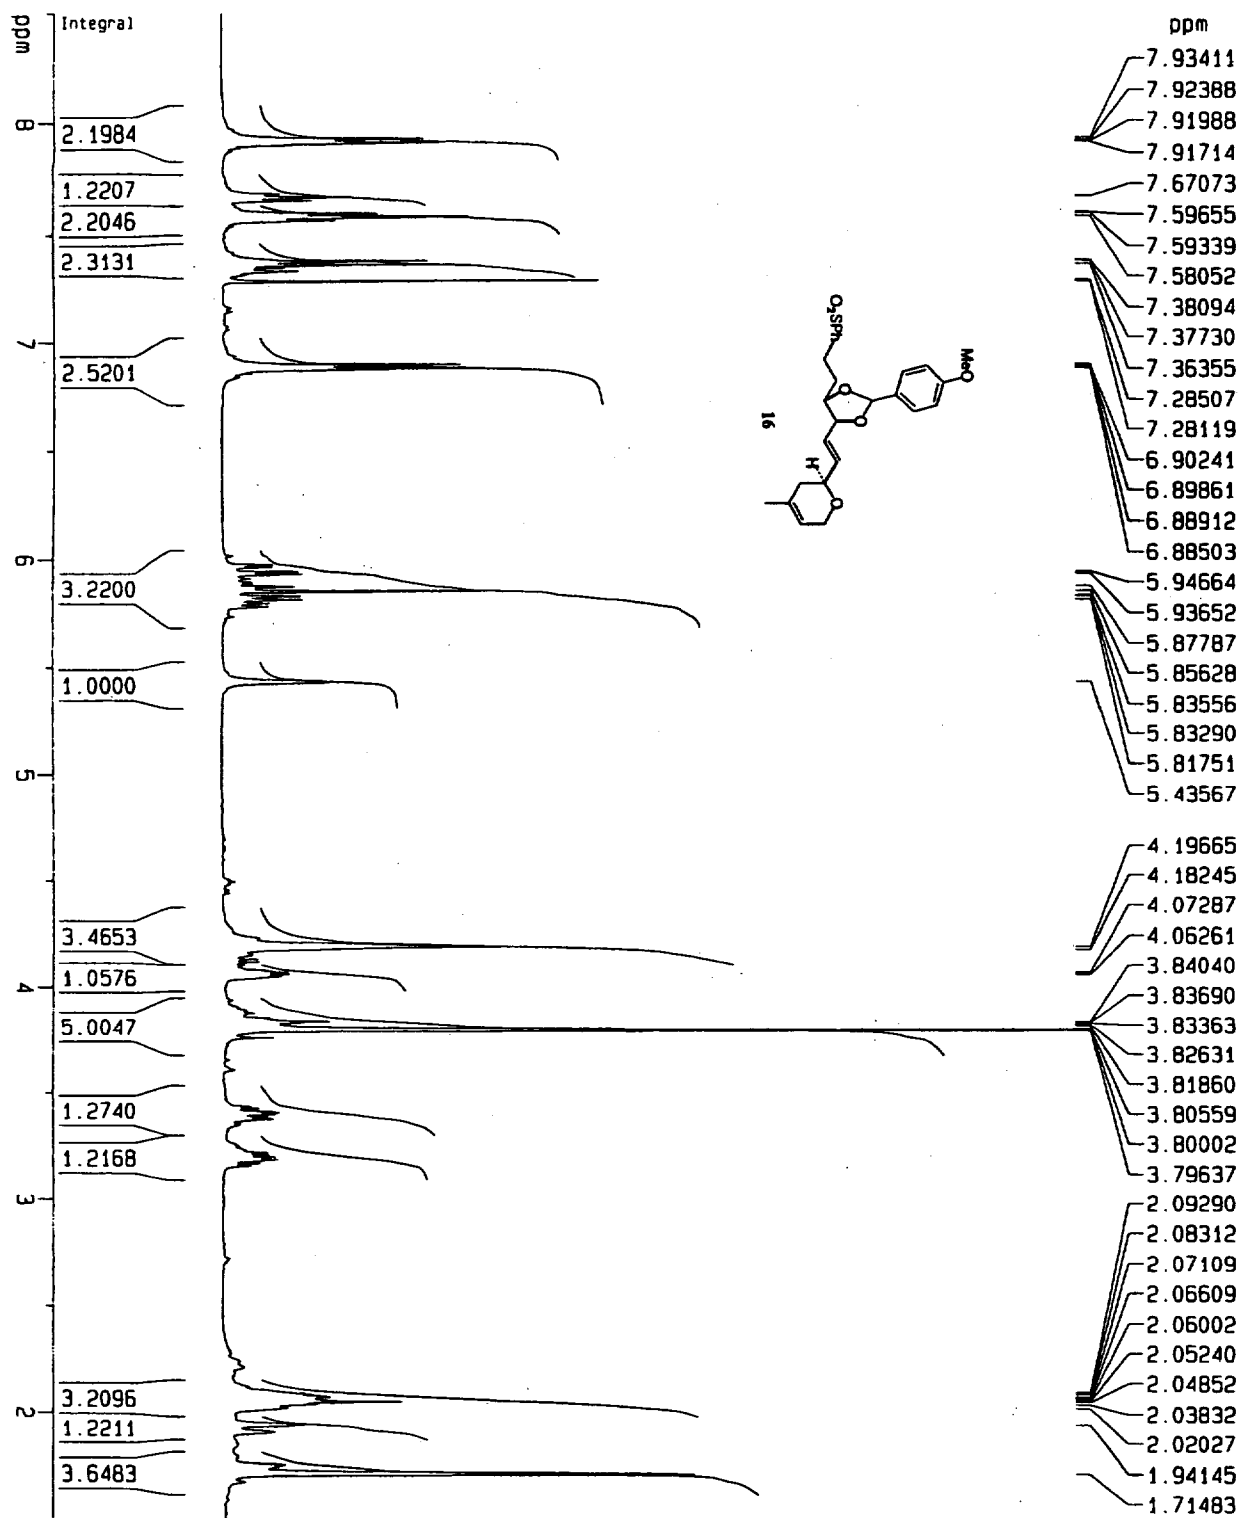

Proton standard parameters, 880 probe

Current Data Parameters  
 NAME M400  
 EXPNO 1  
 PROCNO 1

F2 - Acquisition Parameters  
 Date\_ 20000626  
 Time 19.27  
 INSTRUM spect  
 PROBH0 5 mm 880 BB-1  
 PULPROG zg  
 TD 32768  
 SOLVENT C0C13  
 NS 8  
 DS 2  
 SWH 6009.615 Hz  
 FIDRES 0.183399 Hz  
 AQ 2.763477 sec  
 RG 32  
 DM 83.200 usec  
 DE 6.00 usec  
 TE 300.0 K  
 D1 1.00000000 sec  
 P1 5.00 usec  
 SFO1 500.1327507 MHz  
 NUC1 1H  
 PL1 3.00 dB

F2 - Processing parameters  
 SI 16384  
 SF 500.1300000 MHz  
 MIDW EM  
 SSB 0  
 LB 0.20 Hz  
 GB 0  
 PC 1.00

1D NMR plot parameters  
 CX 20.00 cm  
 F1P 8.500 ppm  
 F1 4251.10 Hz  
 F2P 1.500 ppm  
 F2 750.20 Hz  
 PPMCM 0.35000 ppm/cm  
 HZCM 175.04550 Hz/cm

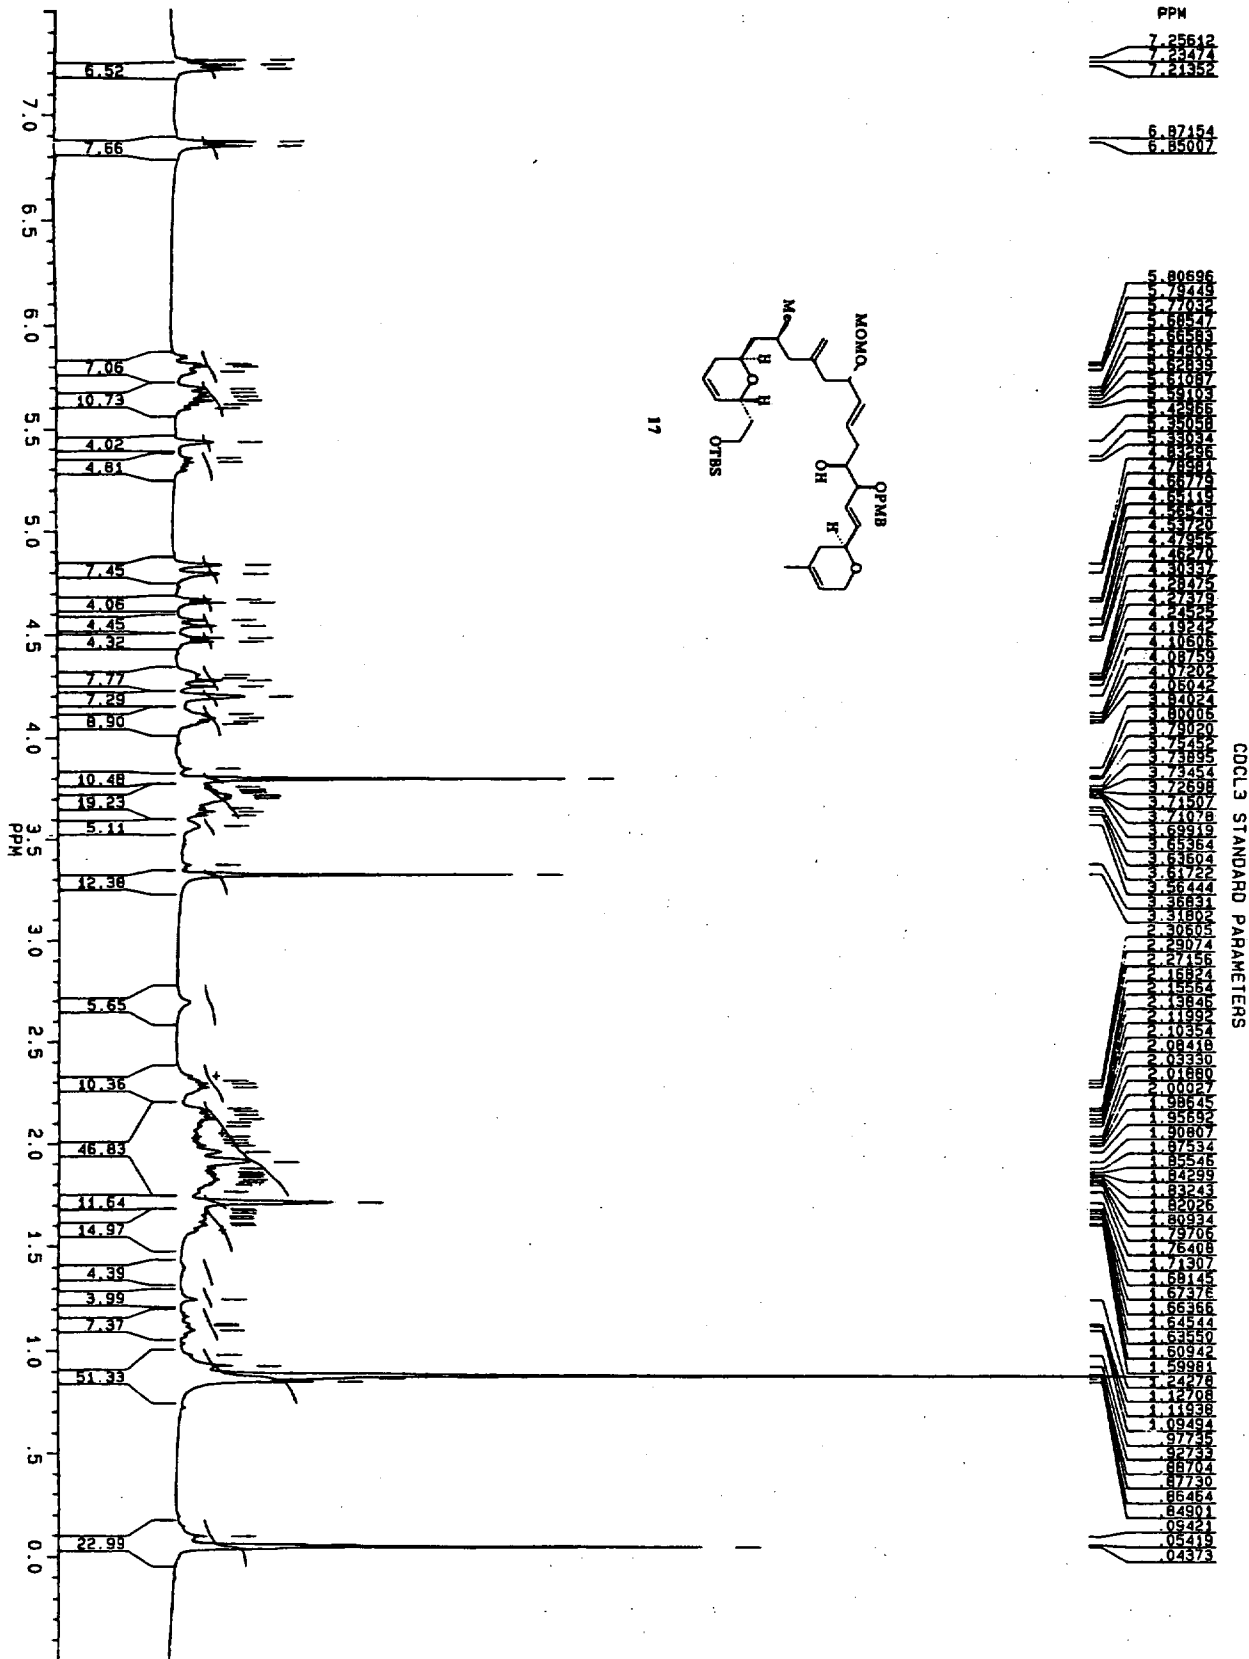

REF:YANI.001  
 DATE:30-6-0  
 SF 400.134  
 SY 133.0  
 O1 6600.000  
 SI 16384  
 TD 16384  
 SW 4807.692  
 HZ/PT .587  
 PW 6.0  
 RD 1.000  
 AQ 1.704  
 HG 20  
 NS 8  
 TE 297  
 FW 6100  
 F2 6600.000  
 DP 63L P0  
 LB 100  
 GB 0.0  
 CX 34.00  
 CY 20.00  
 F1 7.501P  
 F2 .498P  
 HZ/CM 94.142  
 PPM/CM .235  
 SR 4395.00

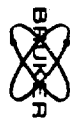

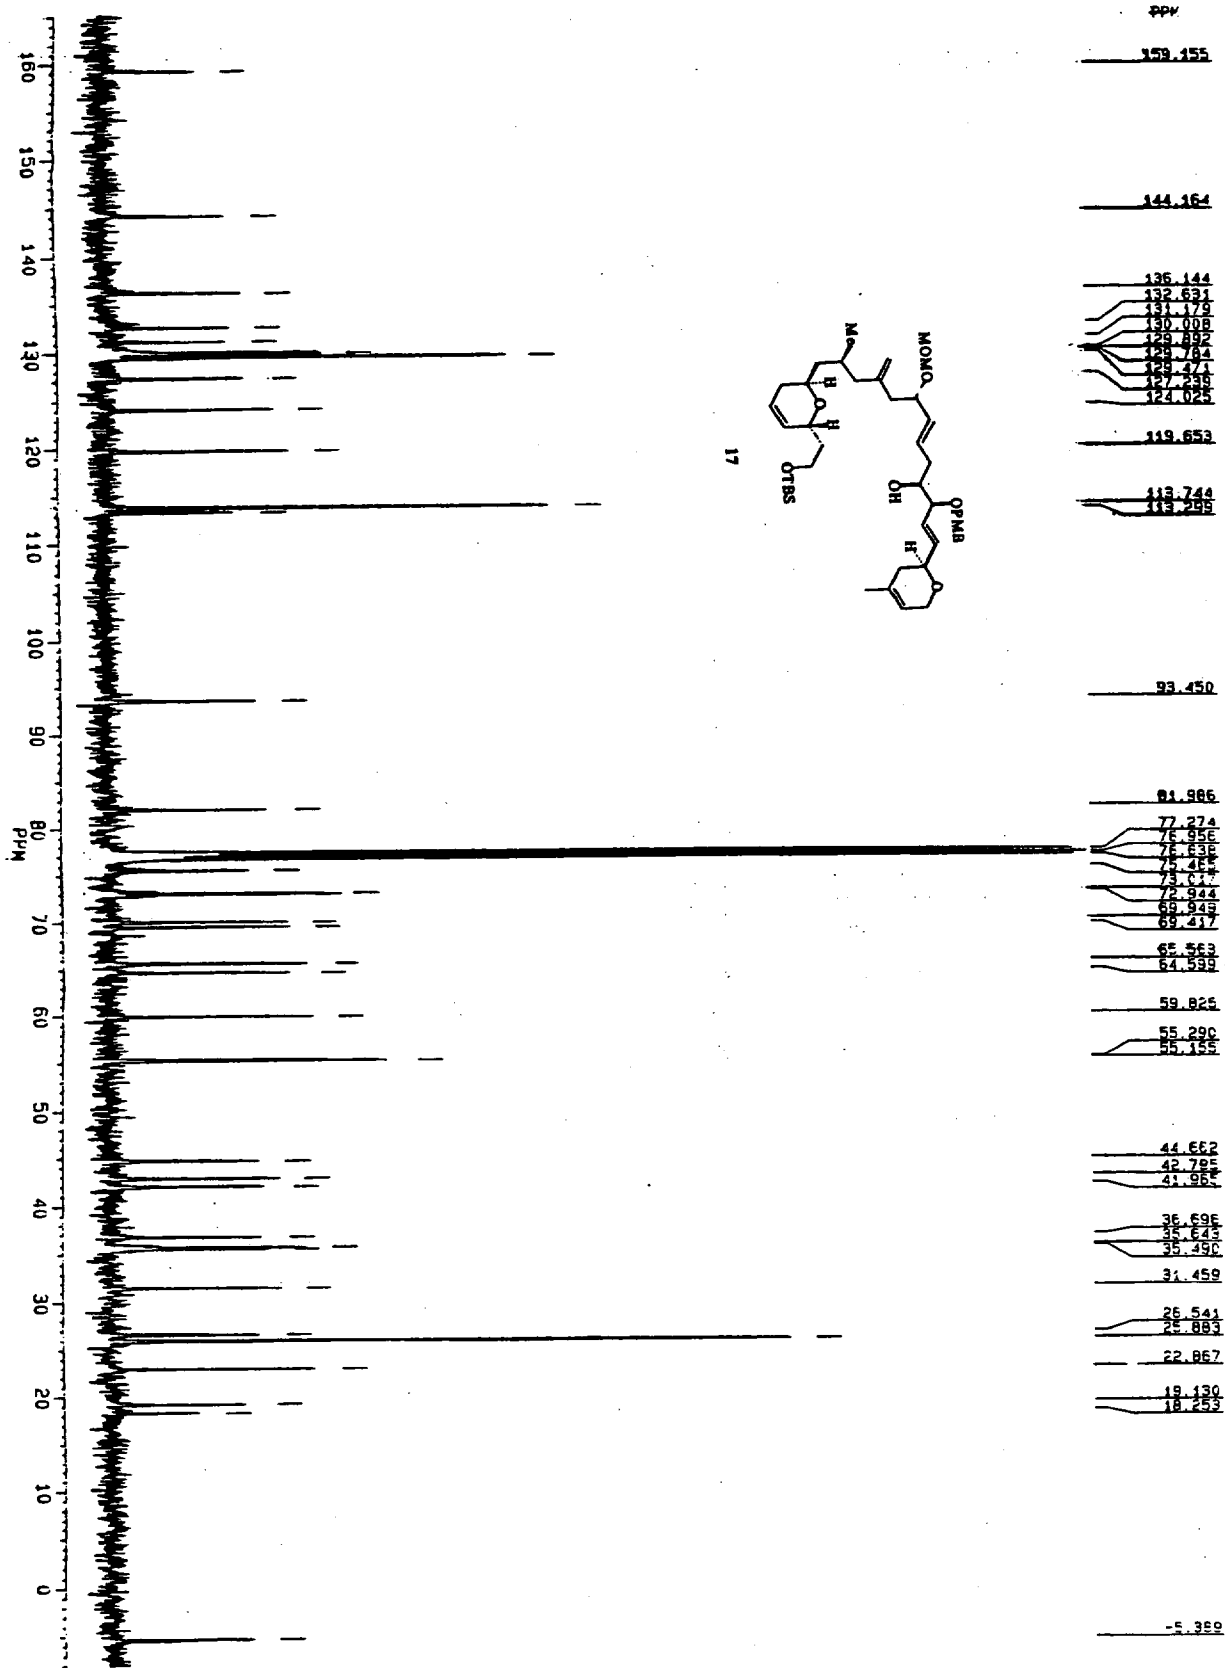

CDCl3 C13 STANDARD PARAMETERS

SF 100.614  
 SY 74.0  
 O1 4970.000  
 SI 32768  
 TD 32768  
 SN 13809.524  
 HZ/PT 1.453  
 PW 3.4  
 HD 2.000  
 AU 688  
 HG 800  
 HS 256  
 TE 500  
 FM 29800  
 U2 6800.000  
 DP 2L CPD  
 LB 3.000  
 GB 0.0  
 CX 34.00  
 CY 20.00  
 F1 16.0028  
 F2 -7.0028  
 HZ/CM 511.960  
 PPM/CM 5.088  
 SH -6118.00

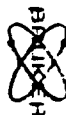



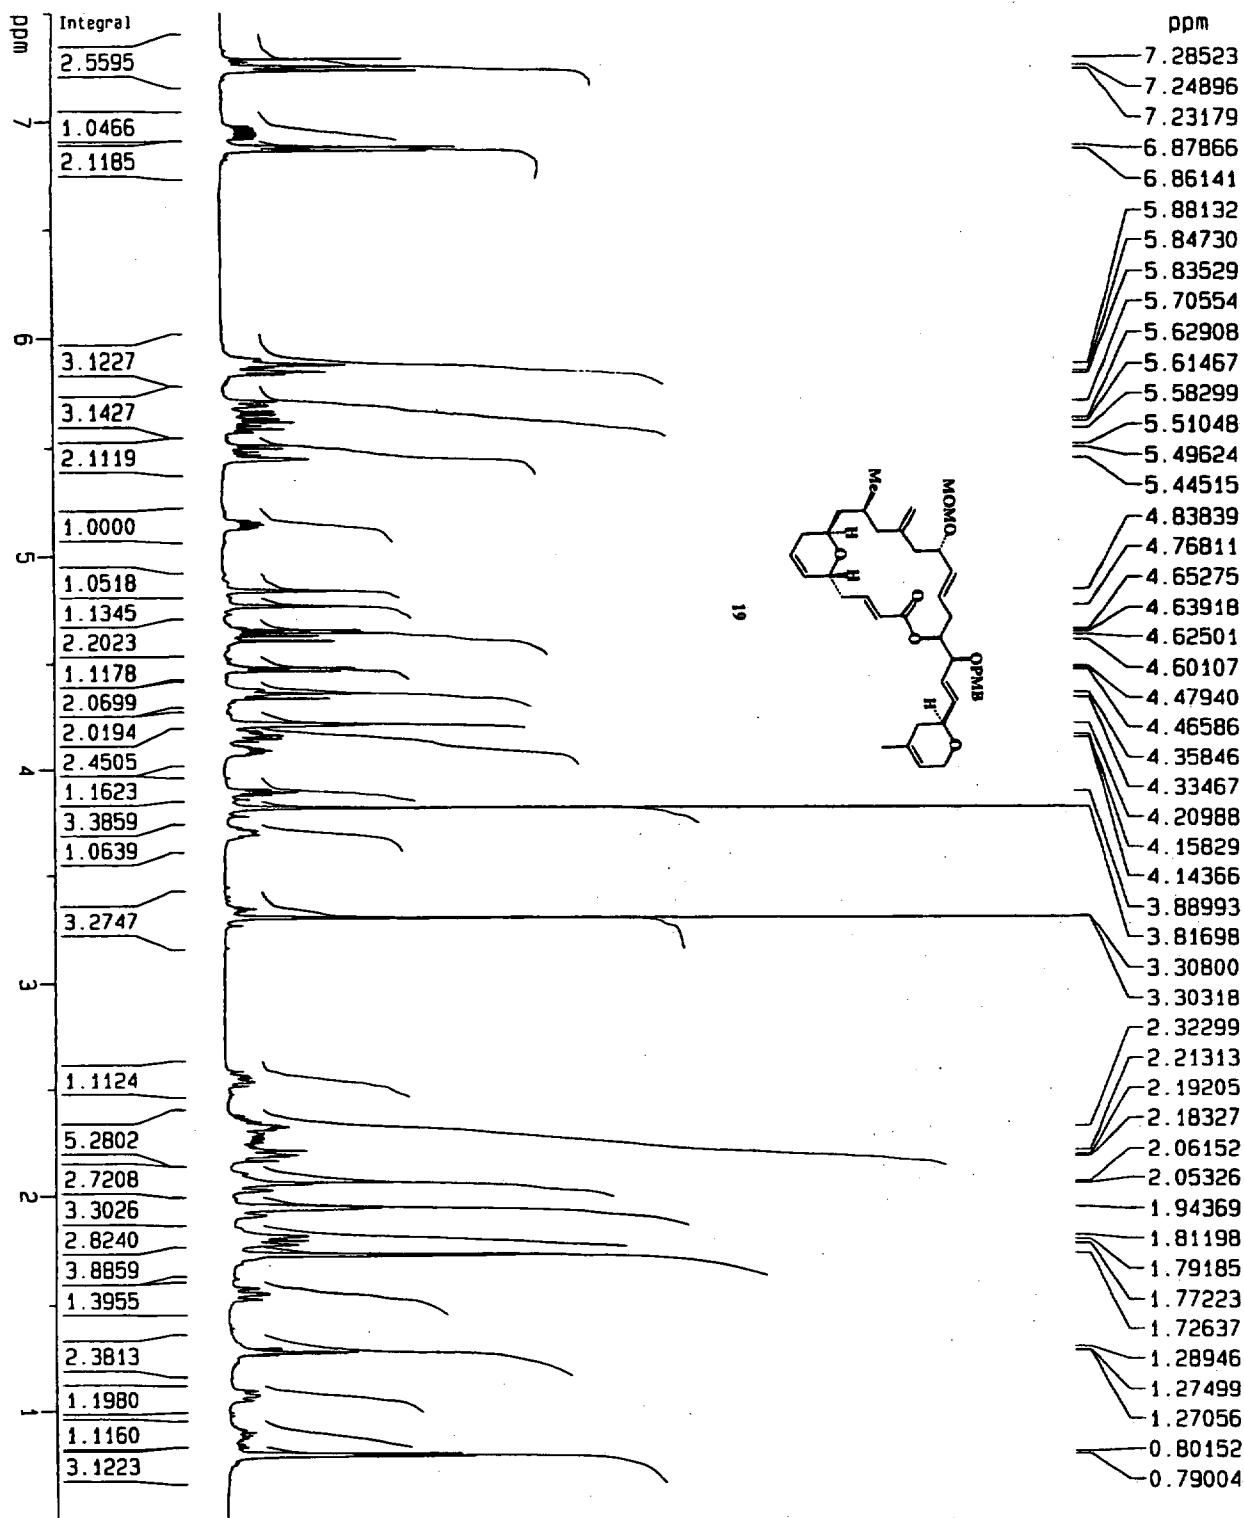

Proton standard parameters. BBO probe

Current Data Parameters

NAME M703

EXPNO 3

PROCNO 1

F2 - Acquisition Parameters

Date\_ 20000703

Time 15.00

INSTRUM spect

PROBHD 5 mm BBO BB-1

PULPROG zg

TD 32768

SOLVENT CDCl3

NS 8

DS 2

SMH 6009.615 Hz

FIDRES 0.183399 Hz

AQ 2.7263477 sec

RG 64

DM 83.200 usec

DE 6.00 usec

TE 300.0 K

D1 1.00000000 sec

P1 5.00 usec

SF01 500.1327507 MHz

NUC1 1H

PL1 3.00 dB

F2 - Processing parameters

SI 16384

SF 500.1300000 MHz

WDW EM

SSB 0

LB 0.20 Hz

GB 0

PC 1.00

1D NMR plot parameters

CX 20.00 cm

F1P 7.500 ppm

F1 3750.98 Hz

F2P 0.500 ppm

F2 250.07 Hz

PPMCM 0.35000 ppm/cm

HZCM 175.04550 Hz/cm

Carbon-13 standard parameters, BBO probe

| ppm     |
|---------|
| 165.631 |
| 159.499 |
| 146.490 |
| 145.029 |
| 135.869 |
| 134.985 |
| 131.704 |
| 130.708 |
| 129.711 |
| 129.151 |
| 127.853 |
| 126.980 |
| 126.078 |
| 123.369 |
| 120.110 |
| 114.100 |
| 94.353  |
| 79.801  |
| 77.705  |
| 77.451  |
| 77.197  |
| 74.880  |
| 74.487  |
| 73.659  |
| 71.982  |
| 70.483  |
| 66.005  |
| 65.333  |
| 55.705  |
| 55.652  |
| 44.992  |
| 43.892  |
| 41.827  |
| 36.878  |
| 36.138  |
| 32.674  |
| 31.793  |
| 30.103  |
| 26.177  |
| 23.348  |
| 18.604  |

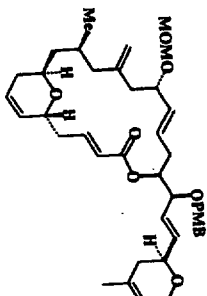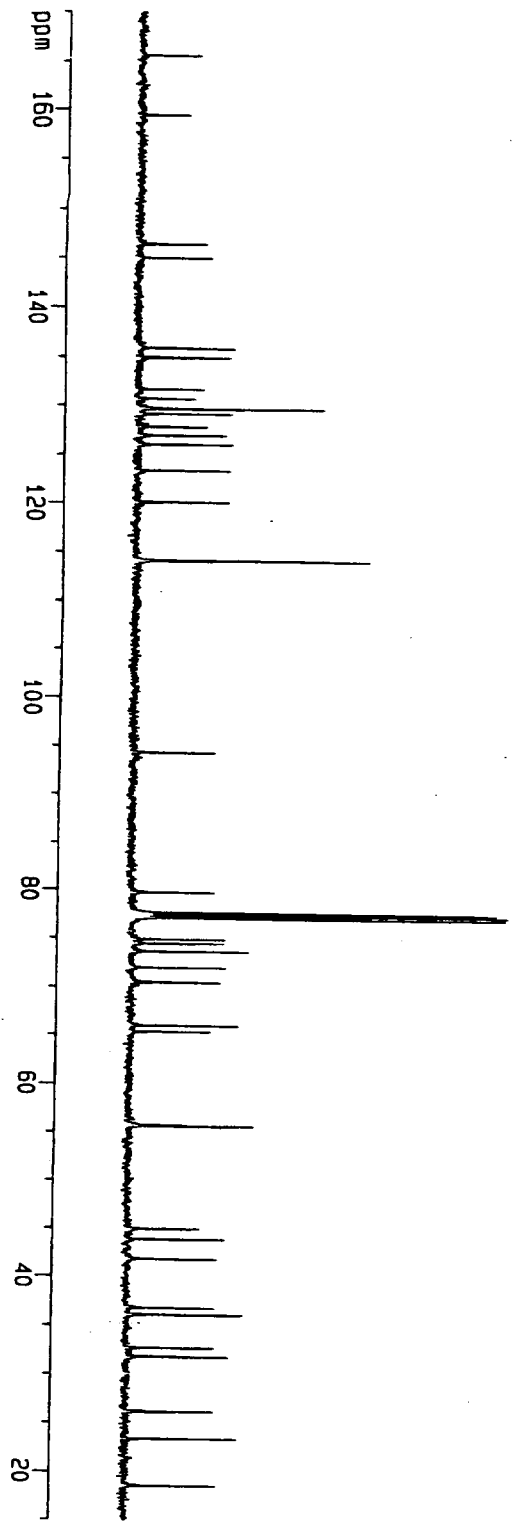

Current Data Parameters  
 NAME M703  
 EXPNO 4  
 PROCNO 1

F2 - Acquisition Parameters

Date\_ 20000703  
 Time 15.09  
 INSTRUM spect  
 PULPROG 5 mm BBO BB-1  
 TD 2999  
 SOLVENT COC13  
 NS 240  
 DS 2  
 SMH 30303.031 Hz  
 FIDRES 0.924775 Hz  
 AQ 0.540720 sec  
 RG 8192  
 DM 16.500 usec  
 DE 6.00 usec  
 TE 300.0 K  
 d11 0.03000000 sec  
 d12 0.00002000 sec  
 PL13 22.00 dB  
 D1 2.00000000 sec  
 CPDPRG2 wal1z16  
 PCPD2 80.00 usec  
 SF02 500.1320000 MHz  
 NUC2 1H  
 PL2 3.00 dB  
 PL12 22.00 dB  
 P1 3.00 usec  
 SF01 125.7715724 MHz  
 NUC1 13C  
 PL1 0.00 dB

F2 - Processing parameters

SI 32768  
 SF 125.7577390 MHz  
 MDW EM  
 SSB 0  
 LB 3.00 Hz  
 GB 0  
 PC 1.40

1D NMR plot parameters

CX 20.00 cm  
 F1P 170.000 ppm  
 F1 21378.81 Hz  
 F2P 15.000 ppm  
 F2 1886.37 Hz  
 PPMCH 7.75000 ppm/cm  
 HZCM 974.62244 Hz/cm

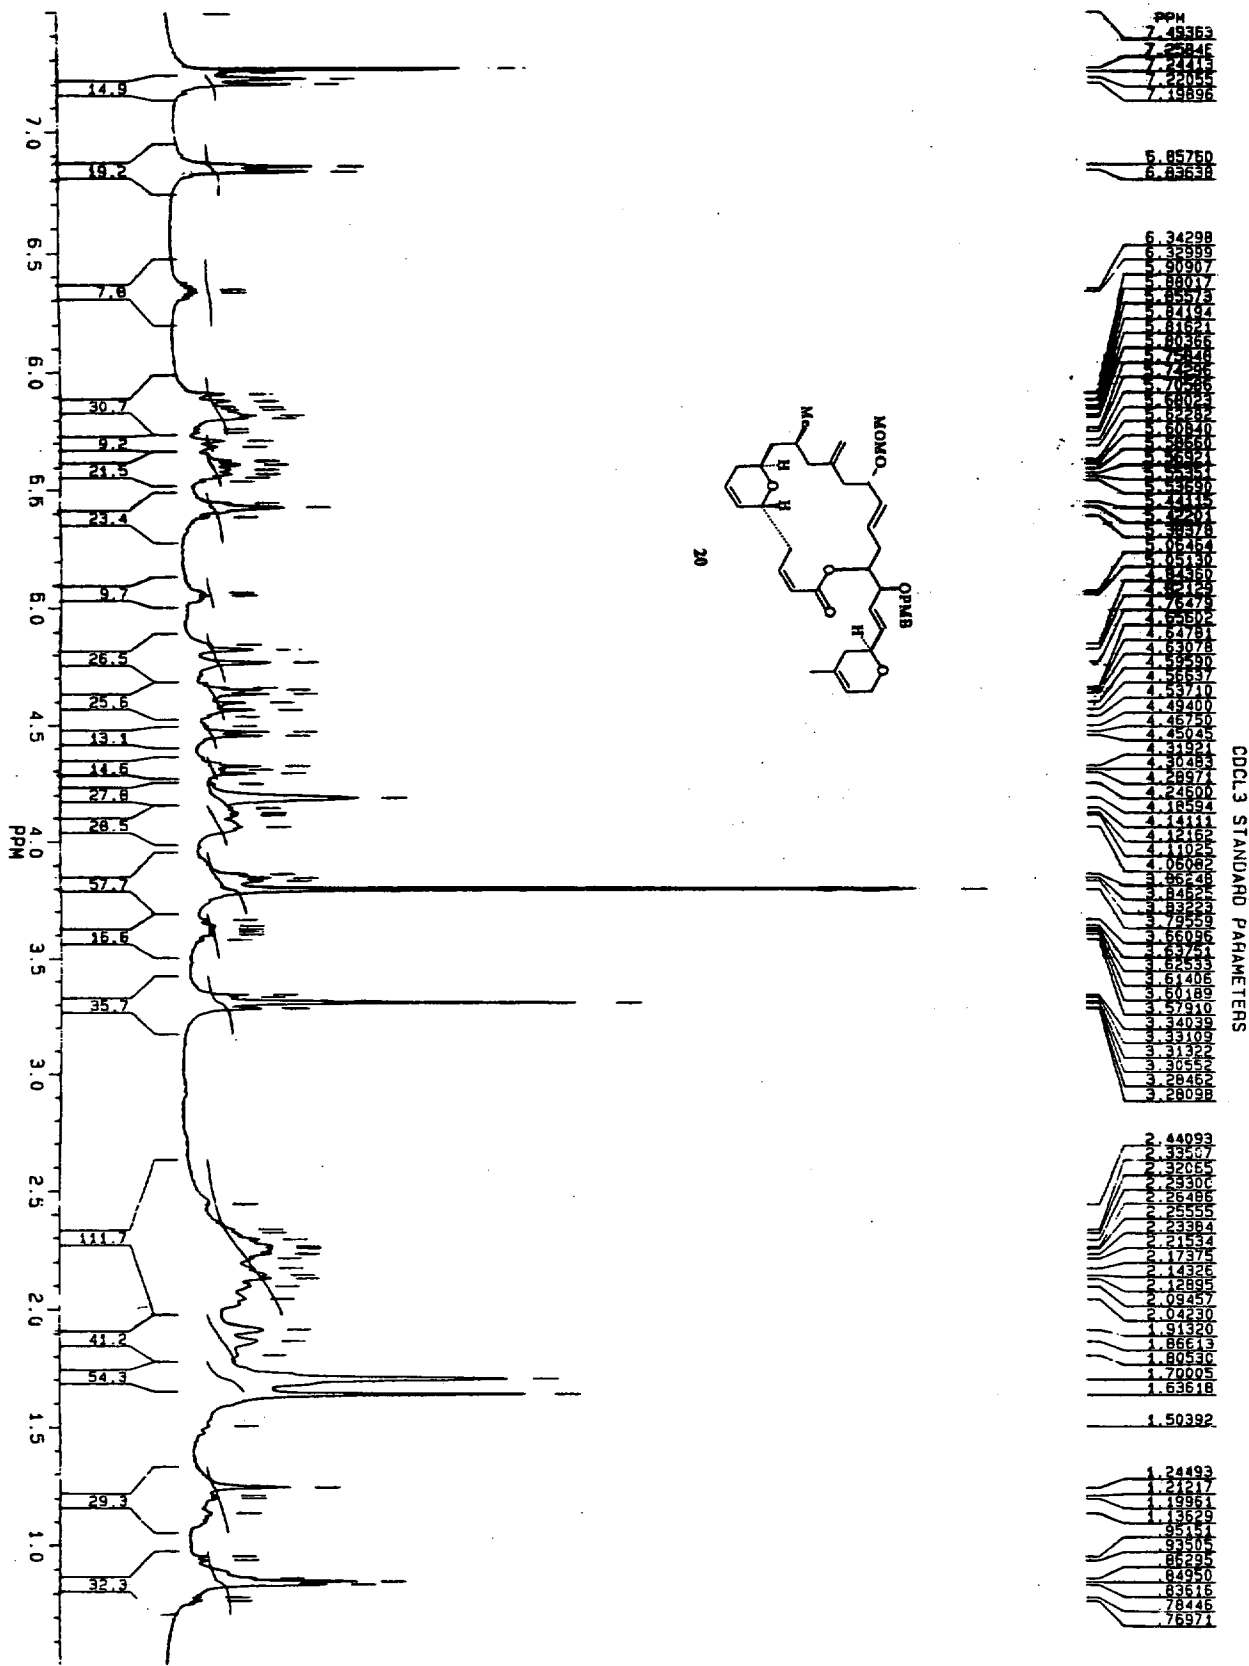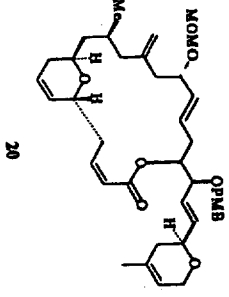

**BIOVIA**  
 REF05101.013  
 DATE 6-7-0  
 SF 400.134  
 SY 133.0  
 O1 6600.000  
 S1 18384  
 TD 18384  
 SM 4807.692  
 HZ/PT 587  
 PW 6.0  
 RD 1.000  
 AQ 1.704  
 RG 40  
 RS 55  
 NS 237  
 TE  
 FM 6100  
 O2 6600.000  
 DP 63L PD  
 LB 0.100  
 GB 0.0  
 CX 34.00  
 CY 15.00  
 F1 7.501P  
 F2 500P  
 HZ/CM R2.387  
 PPM/CM 205  
 SR 4335.00
